# Supplementary material
Source: Copernicus journal article supplement (doi:10.5194/essd-18-1561-2026)
Supplement: Supplementary file 1 [file Metadata.xlsx]

## Sheet: Database
Sample	Depth	DEM	Slope	Aspect	AI	MAT	MAP	Graze	NPP	NDVI	Fe	Mn	Zn	V	Ecosystem	Lithology
TP001	0-10cm	4390	8.02404	29.268	0.7719	-1.04587	635.73	25.8167	108.624	0.543517	27289.9	1044.31	45.38	57.5	Meadow	Acid igneous rock
TP002	0-10cm	4484	21.7736	135.548	0.6059	0.581696	577.75	25.8167	225.47	0.721737	26603.4	537.05	28.9867	68.105	Meadow	Acid metamorphic rock
TP003	0-10cm	4214	9.9638	247.38	0.5428	4.25717	588.791	25.9446	149.935	0.46402	34326.7	797.713	35.0933	82.7933	Meadow	Acid metamorphic rock
TP004	0-10cm	4074	20.3218	30.9638	0.5969	1.85016	589.871	25.9446	239.031	0.658372	39188.2	1682.17	45.43	84.9433	Meadow	Acid metamorphic rock
TP005	0-10cm	3891	34.4377	36.6666	0.562	3.85192	600.987	25.9446	231.837	0.621206	37512.8	1237.12	37.66	83.5067	Cropland	Acid metamorphic rock		DEM	Digital elevation model	m
TP006	0-10cm	4290	23.2528	13.6429	0.7037	-1.10629	580.794	43.7056	114.952	0.64829	40820.7	1375.16	48.965	76.345	Meadow	Acid metamorphic rock		Slope	Slope	°
TP007	0-10cm	3834	26.3397	343.346	0.5365	4.74975	585.194	43.7056	224.078	0.727576	27731.1	1024.01	35.5467	62.32	Forest	Acid metamorphic rock		Aspect	Aspect	°
TP008	0-10cm	3963	7.28056	336.961	0.5316	3.46573	563.559	43.7056	316.594	0.708532	40297.5	1623.14	68.9867	114.127	Shrub	Clastic sedimentary rock		AI	Aridity Index	#
TP009	0-10cm	3949	13.8591	335.4	0.4954	3.46069	547.919	32.2122	476.888	0.791166	30418	742.12	34.3433	55.9733	Forest	Acid metamorphic rock		MAT	Mean annual temperature	℃
TP010	0-10cm	4237	18.6541	75.63	0.6696	-0.636371	582.159	40.099	397.988	0.788872	21222.2	993.497	33.6267	61.71	Forest	Acid metamorphic rock		MAP	Mean annual precipitation	mm
TP011	0-10cm	3883	29.2324	333.311	0.5254	3.54733	574.723	24.8994	347.081	0.733931	27189	1833.82	27.7233	60.7867	Forest	Clastic sedimentary rock		Graze	Grazing intensity	head
TP012	0-10cm	3332	3.85156	190.408	0.4084	7.05551	517.852	40.099	502.891	0.710842	21996.6	546.39	28.24	51.095	Forest	Acid metamorphic rock		NPP	Net primary productivity	g C m-2 year-2
TP013	0-10cm	3757	12.6444	248.07	0.5459	1.38838	559.324	40.099	299.935	0.804675	22530.7	657.08	27.69	67.305	Forest	Acid metamorphic rock		NDVI	Normalized difference vegetation index	#
TP014	0-10cm	3538	24.9217	60.7512	0.4334	5.90205	528.396	40.099	382.306	0.751203	24113.3	832.71	33.6733	63.67	Forest	Acid metamorphic rock		Fe	Total Fe	mg kg-1
TP015	0-10cm	3577	31.6854	15.1011	0.4455	5.21809	547.429	40.099	446.531	0.784617	27358.6	878.873	26.63	70.89	Forest	Acid metamorphic rock		Mn	Total Mn	mg kg-1
TP016	0-10cm	3604	14.0883	208.635	0.2265	6.66443	330.873	11.8179	249.324	0.542967	20188	497.937	18.5533	38.4433	Steppe	Clastic sedimentary rock		Zn	Total Zn	mg kg-1
TP017	0-10cm	4584	3.66765	161.565	0.2893	0.398452	299.84	62.2201	52.5627	0.262786	8818.13	307.407	10.6533		Steppe	Fluvial		V	Total V	mg kg-1
TP018	0-10cm	4584	3.53012	208.811	0.2682	1.00778	278.217	62.2201	33.4342	0.259526	10162.4	342.1	10.3867		Steppe	Fluvial
TP019	0-10cm	4619	3.04738	156.038	0.2589	0.891015	271.589	25.7147	44.7689	0.258339	11992.6	427.82	13.0267	30.9	Meadow	Clastic sedimentary rock
TP020	0-10cm	4618	1.64202	188.13	0.2356	1.07291	259.676	25.7147	49.3006	0.377117	8202.12	263.87	15.8567		Meadow	Fluvial
TP021	0-10cm	5207	4.71805	177.184	0.2045	-3.49278	200.576	53.3177	39.3041	0.304316	24010.8	557.27	40.7233	54.6267	Meadow
TP022	0-10cm	5016	4.54744	260.218	0.203	-1.19653	232.477	53.3177	67.3076	0.307033	16743.8	439.323	19.5567	38.4033	Steppe	Fluvial
TP023	0-10cm	4781	11.1036	157.319	0.209	0.190931	256.933	53.3177	75.2242	0.412086	22661.9	584.57	28.2933	52.15	Meadow	Fluvial
TP024	0-10cm	4415	11.2822	139.946	0.2308	2.1127	319.329	42.1277	32.5755	0.343396	17718.4	687.558	45.3825		Meadow	Clastic sedimentary rock
TP025	0-10cm	5005	11.7047	277.496	0.25	2.03945	349.008	42.1277	157.145	0.529893	25071.9	688.067	28.9017	62.874	Meadow	Acid metamorphic rock
TP026	0-10cm	4069	14.1914	177.856	0.2752	4.77562	428.519	46.9842	167.26	0.501849	28146.3	644.963	27.2367	62.1833	Steppe	Fluvial
TP027	0-10cm	4875	10.4298	57.5933	0.2696	-1.14779	333.062	46.9842	172.816	0.554549	25784.1	558.107	30.3067	56.9233	Meadow	Acid metamorphic rock
TP028	0-10cm	4857	4.19924	276.34	0.2721	-0.799094	340.104	49.5321	168.896	0.638664	26664.7	591.283	49.5633	51.9767	Meadow	Acid metamorphic rock
TP029	0-10cm	3831	3.41677	5.19443	0.272	6.43623	440.978	14.5345	173.82	0.638304	33059.3	607.2	57.31	56.8767	Cropland	Clastic sedimentary rock
TP030	0-10cm	3808	14.0364	0.309703	0.2521	7.28333	414.453	11.7083	156.97	0.541758	24439.5	543.117	29.0533	53.8967	Cropland	Clastic sedimentary rock
TP031	0-10cm	3826	14.4271	18.0543	0.25	6.13161	398.9	23.4319	210.22	0.691363	22203.3	468.183	23.4067	48.1733	Shrub	Clastic sedimentary rock
TP032	0-10cm	4245	6.53139	348.425	0.3083	2.05544	385.24	23.4319	285.119	0.752443	24679.9	613.12	26.81	58.335	Shrub	Fluvial
TP033	0-10cm	3401	10.5026	314.409	0.38	7.07595	508.462	13.186	566.815	0.735659	23990.3	740.767	43.9367	55.4767	Forest	Clastic sedimentary rock
TP034	0-10cm	5043	45.5835	323.616	0.878	-3.9162	593.431	13.186	29.581	0.336168	26825.1	656.563	39.1267	53.2867	Meadow	Clastic sedimentary rock
TP035	0-10cm	3011	0.437983	135	0.554	8.00431	648.387	8.28594	469.53	0.528866	27126.7	670.967	35.1567	66.975	Steppe	Carbonate rock
TP036	0-10cm	4156	11.3786	319.357	0.7497	-0.57492	617.498	8.28594	212.465	0.794415	30218.3	679.037	34.8367	65.12	Meadow	Acid igneous rock
TP037	0-10cm	2683	0.309704	270	0.7209	9.79658	840.653	8.61093	368.521	0.667663	25389.8	565.19	31.2067	55.885	Forest	Fluvial
TP038	0-10cm	3048	3.635	141.911	0.7363	7.50566	802.163	8.61093	333.734	0.742927	25633	698.65	38.1367		Forest	Eolean
TP039	0-10cm	4459	9.21668	102.995	0.8188	-2.07901	637.999	25.8167	138.668	0.52553	35762	865.68	53.6467	64.41	Meadow	Acid igneous rock
TP040	0-10cm	4256	5.9529	288.905	0.7022	1.47159	785.615	18.1607	24.0545	0.192472	18659	427.753	23.4967	36.56	Steppe	Eolean
TP041	0-10cm	4636	0.244843	288.435	0.2989	-1.07334	297.647	62.2201	39.2448	0.383902	13551.4	413.487	19.0733		Meadow	Fluvial
TP042	0-10cm	4595	2.51921	280.62	0.2602	0.413167	274.176	62.2201	42.4057	0.26371	10867.6	420.09	12.6233	27.83	Steppe	Fluvial
TP043	0-10cm	4736	2.78945	160.56	0.2467	-0.481796	254.828	62.2201	33.586	0.139108	10453	299.945	13.5		Meadow	Acid igneous rock
TP044	0-10cm	4905	1.56738	69.7751	0.1648	-1.50736	176.58	62.2201	54.2977	0.369761	15674.2	471.683	18.2733		Steppe	Fluvial
TP045	0-10cm	4945	3.18534	29.0546	0.1778	-1.67344	185.734	62.2201	44.7157	0.282376	13370.9	508.517	25.7033	30.38	Meadow	Fluvial
TP046	0-10cm	5565	2.82352	260.538	0.1799	-6.60612	160.022	48.6119	36.4761	0.295654	11253.6	289.703	19.4033		Meadow
TP047	0-10cm	5336	0.701094	83.6598	0.1683	-4.47844	167.666	48.6119	41.705	0.264446	17485.6	554.693	33.1367		Meadow
TP048	0-10cm	4739	1.28143	25.0169	0.1549	0.972481	215.151	53.3177	39.3023	0.238422	24251.6	614.288	29.58	36.43	Steppe	Clastic sedimentary rock
TP049	0-10cm	5062	0.547473	278.13	0.1741	-1.46027	219.483	53.3177	48.7151	0.270254	11482.9	354.513	21.6267		Meadow	Acid igneous rock
TP050	0-10cm	5162	5.24236	99.3236	0.2444	-2.91382	284.806	42.1277	47.973	0.393119	22431.4	801.933	33.1033	43.99	Meadow	Clastic sedimentary rock
TP051	0-10cm	5065	2.25619	275.906	0.2958	-2.04005	366.562	52.8704	112.308	0.408253	10375.2	246.36	20.59	49.09	Meadow
TP052	0-10cm	4825	2.36745	191.31	0.319	-0.003883	421.184	92.0824	126.274	0.413605	23431	726.563	26.2367	61.5567	Steppe	Fluvial
TP053	0-10cm	4787	0.833853	21.8014	0.3233	0.0329103	421.074	92.0824	154.405	0.426655	13739.2	433.11	17.78	34.24	Steppe	Acid igneous rock
TP054	0-10cm	4525	6.86875	273.215	0.2952	1.75695	414.181	49.5321	153.77	0.541534	13218.9	301.333	19.5433	37.14	Meadow	Acid metamorphic rock
TP055	0-10cm	4190	10.4753	344.745	0.3153	3.15937	440.896	49.5321	236.451	0.745409	21412.9	549.78	27.15	39.33	Shrub	Clastic sedimentary rock
TP056	0-10cm	3894	12.7703	249.404	0.2804	5.24688	411.98	23.4319	226.19	0.55451	21251.8	576.1	26.5633	43.6	Steppe	Clastic sedimentary rock
TP057	0-10cm	3995	2.19162	317.862	0.308	3.96193	415.248	23.4319	314.104	0.7041	27425.3	739.66	28.75	63.8067	Steppe	Acid igneous rock
TP058	0-10cm	3604	8.42398	205.396	0.4855	4.00171	552.876	13.186	419.489	0.784936	27664.4	943.86	30.9933	72.8033	Forest	Clastic sedimentary rock
TP059	0-10cm	3474	0.797106	209.055	0.4942	5.34015	579.847	13.186	492.559	0.699235	29083.7	991.197	39.97	71.25	Forest	Fluvial
TP060	0-10cm	2179	15.5417	30.6773	0.7134	11.5211	868.537	8.61093	610.791	0.784143	18557	459.613	17.28	42.64	Forest	Fluvial
TP061	0-10cm	2832	5.02517	2.64254	0.6553	9.63739	780.46	8.61093	421.415	0.764507	32243.6	758.843	37.89	59.75	Forest	Fluvial
TP062	0-10cm	2842	8.22799	127.405	0.6925	8.07307	771.544	8.61093	456.847	0.825172	32038.4	843.387	38.3633	49.75	Forest	Fluvial
TP063	0-10cm	3313	8.9726	173.118	0.5368	7.97232	657.079	25.8167	146.799	0.304115	18426.6	450.553	19.4767		Shrub	Acid metamorphic rock
TP064	0-10cm	3536	31.489	94.3018	0.5188	6.6649	617.992	25.8167	107.723	0.276263	33647.2	805.407	41.2033	70.8233	Shrub	Acid metamorphic rock
TP065	0-10cm	4619	8.50377	260.112	0.3586	0.236978	389.452	17.0857	33.6025	0.17525	18097.7	323.23	20.5833		Steppe	Clastic sedimentary rock
TP066	0-10cm	4493	0.855143	5.19443	0.3857	1.76227	457.37	33.9144	23.0963	0.17199	7643.22	241.473	11.4133		Steppe	Eolean
TP067	0-10cm	4553	0.789551	281.31	0.4858	-0.465781	567.764	18.1607	31.956	0.156025	19968.3	563.808	25.99	38.37	Steppe	Acid igneous rock
TP068	0-10cm	4616	0.451462	329.036	0.4564	0.132466	511.847	18.1607	14.4639	0.186796	13834.5	456.24	26.1575		Steppe	Fluvial
TP069	0-10cm	4768	5.05929	257.661	0.3488	-1.33279	378.709	18.1607	40.967	0.391086	15217.4	443.691	19.4643	37.385	Meadow	Fluvial
TP070	0-10cm	4914	3.30671	190.784	0.296	-2.25461	306.261	18.1607	44.3901	0.216879	18348.2	463.477	17.7933	44.79	Steppe	Acid igneous rock
TP071	0-10cm	4885	6.69172	57.2251	0.2919	-3.01733	283.282	62.2201	62.2516	0.263455	23434.1	530.73	35.65	61.52	Meadow	Clastic sedimentary rock
TP072	0-10cm	4930	7.83764	133.409	0.2339	-3.42137	218.282	62.2201	26.6402	0.22395	18779.1	550.977	26.1867	38.21	Meadow	Acid igneous rock
TP073	0-10cm	4608	0.547473	8.1301	0.1252	1.16628	150.892	62.2201	25.0673	0.160741	16843.5	646.817	38.7767		Steppe	Acid igneous rock
TP074	0-10cm	4765	1.20926	219.806	0.1194	-0.0888958	148.315	48.6119	30.6476	0.181696	31872.2	703.303	27.92	62.56	Steppe	Clastic sedimentary rock
TP075	0-10cm	4184	1.39341	90	0.4351	3.55263	563.085	33.9144	32.8617	0.249603	19781.8	321.957	22.4433		Meadow	Eolean
TP076	0-10cm	4738	1.33186	35.5377	0.1298	0.446341	163.652	48.6119	29.6986	0.148796	15659.8	371.03	34.1933	31.29	Steppe	Acid igneous rock
TP077	0-10cm	4774	1.54816	216.87	0.134	0.388707	174.438	48.6119	28.6127	0.266073	14927.9	334.56	25.17		Steppe	Acid igneous rock
TP078	0-10cm	4706	5.27393	197.904	0.1393	0.824052	197.461	53.3177	43.8898	0.258518	13227.6	429.08	18.42		Steppe	Clastic sedimentary rock
TP079	0-10cm	4751	0.789551	258.69	0.1642	0.893011	237.281	53.3177	30.1823	0.224826	16997.4	451.807	22.8	34.9333	Steppe	Fluvial
TP080	0-10cm	4715	1.8832	189.462	0.2119	1.52287	320.733	112.626	43.5926	0.209295	11385.5	309.44	15.3867		Steppe	Fluvial
TP081	0-10cm	4738	2.01821	32.4712	0.2553	1.70559	378.607	112.626	54.232	0.310848	17060	452.853	17.83	43.185	Steppe	Fluvial
TP082	0-10cm	4770	2.1998	140.711	0.2905	1.36667	421.54	52.8704	45.6031	0.292718	18908.6	437.842	23.795	52.1333	Steppe	Clastic sedimentary rock
TP083	0-10cm	4810	2.49775	73.8108	0.3004	0.59079	418.654	52.8704	54.2183	0.27027	26652.8	715.03	35.34	67.38	Meadow	Clastic sedimentary rock
TP084	0-10cm	4784	0.833853	248.199	0.3317	-0.0154085	441.077	92.0824	83.5944	0.502193	23964.4	533.06	21.5133	29.66	Steppe	Acid igneous rock
TP085	0-10cm	4175	0.437983	315	0.3971	3.31704	511.57	20.2286	20.6065	0.168876	15783.1	382.215	17.65		Steppe	Fluvial
TP086	0-10cm	4757	0.76644	225	0.3425	0.168829	448.283	92.0824	73.3522	0.200455	14598.6	377.62	17.4325		Steppe	Acid igneous rock
TP087	0-10cm	4284	0.77422	143.13	0.3057	3.60552	442.275	49.5321	367.567	0.746553	23603.8	646.98	23.19	42.545	Meadow	Fluvial
TP088	0-10cm	4657	1.91159	121.759	0.3744	-0.203331	447.601	100.901	168.423	0.538153	26431.2	702.28	34.88	54.45	Meadow	Acid metamorphic rock
TP089	0-10cm	4892	3.82673	135	0.6301	-3.35586	589.801	29.3925	164.805	0.638089	27474.8	730.757	42.31	62.55	Meadow	Fluvial
TP090	0-10cm	4637	32.1178	320.416	0.803	-5.19653	648.64	29.3925	29.9976	0.509295	21980.4	590.082	34.792	49.1533	Shrub	Acid igneous rock
TP091	0-10cm	4009	4.7067	246.801	0.6465	0.00760033	638.703	20.2243	211.31	0.711217	13210.9	462.003	20.16		Shrub	Fluvial
TP092	0-10cm	4416	1.0783	338.962	0.3012	1.97889	372.335	14.7594	24.6327	0.134386	14756.6	296.843	15.21		Steppe	Eolean
TP093	0-10cm	3691	16.055	14.6888	0.4655	5.27743	615.961	21.7068	357.019	0.661628	32663.4	959.823	44.7333	86.9033	Shrub	Acid igneous rock
TP094	0-10cm	4070	7.68464	187.481	0.5574	2.24704	616.129	21.7068	181.92	0.590559	31844.5	651.977	33.6767	67.1167	Shrub	Acid metamorphic rock
TP095	0-10cm	4348	2.3395	214.216	0.5724	1.09681	579.446	25.8167	204.526	0.601786	18533.8	660.707	37.2433	38.63	Meadow	Clastic sedimentary rock
TP096	0-10cm	3111	4.84842	67.5206	0.4373	7.31843	546.771	32.2122	273.553	0.534187	24873.2	593.4	29.14	39.03	Shrub	Eolean
TP097	0-10cm	4829	2.17243	274.086	0.2373	-0.803268	268.864	14.7594	36.3609	0.239769	40207.3	361.557	42.4433	79.8467	Meadow	Clastic sedimentary rock
TP098	0-10cm	4691	0.789551	11.3099	0.5819	-2.09278	672.909	14.9602	48.888	0.241341	31571.7	674.257	33.86	77.53	Steppe	Acid igneous rock
TP099	0-10cm	3956	2.70239	23.6294	0.5542	3.85248	780.135	14.9602	18.5088	0.108953	13454.7	336.94	16.0633		Steppe	Fluvial
TP100	0-10cm	4794	4.74817	201.975	0.3632	-2.0955	440.995	14.9602	30.3255	0.169576	26568.9	596.843	21.4333	51.5333	Steppe	Fluvial
TP101	0-10cm	4429	2.07667	63.4349	0.4165	0.414216	520.066	21.3991	48.378	0.311866	13742.4	425.46	15.55	53.24	Steppe	Fluvial
TP102	0-10cm	4742	12.3952	81.8699	0.199	-0.191335	239.255	34.8389	49.8256	0.267247	32500.1	515.197	29.68	47.73	Meadow	Acid igneous rock
TP103	0-10cm	4901	4.24435	190.491	0.3872	-2.99284	418.712	18.1607	45.2525	0.263923	21821.6	556.14	26.28	63.5833	Steppe	Acid igneous rock
TP104	0-10cm	5131	1.54816	306.87	0.2083	-4.69864	223.507	53.9345	32.445	0.243724	18191.9	439.85	20.1233	43.075	Meadow	Acid igneous rock
TP105	0-10cm	4842	1.16382	93.8141	0.1495	-1.6982	181.312	53.9345	27.302	0.171213	18636.9	498.067	24.1067	41.34	Steppe	Acid igneous rock
TP106	0-10cm	4969	2.41002	317.603	0.1422	-2.5035	165.364	53.9345	25.7127	0.187935	10214.6	283.81	25.68		Steppe	Clastic sedimentary rock
TP107	0-10cm	4864	1.81191	199.983	0.1279	-1.24872	148.98	62.2201	33.2812	0.228566	12622.2	381.45	19.13		Steppe	Acid igneous rock
TP108	0-10cm	4522	1.80529	59.0362	0.1072	1.74382	135.138	62.2201	38.0772	0.18212	17796.1	483.03	22.16	47.52	Steppe	Acid igneous rock
TP109	0-10cm	4497	9.30171	356.689	0.1005	1.83903	129.214	62.2201	25.4078	0.185526	20836.1	603.067	32.5967		Steppe	Clastic sedimentary rock
TP110	0-10cm	4760	0.692492	333.435	0.1028	0.764633	134.524	48.6119	15.8902	0.210212	12625.8	350.1	16.6167	37.37	Steppe	Clastic sedimentary rock
TP111	0-10cm	4728	2.55456	181.736	0.1157	0.650528	153.35	48.6119	47.156	0.29954	17376.3	471.3	24.1633		Steppe	Acid igneous rock
TP112	0-10cm	4725	1.35416	120.964	0.1085	0.403847	155.204	112.626	18.6751	0.181893	11950.3	381.34	16.4167		Steppe	Acid igneous rock
TP113	0-10cm	4295	6.98839	284.036	0.1992	2.69642	268.224	18.8659	37.9761	0.348506	24437.6	584.137	23.4633		Steppe	Fluvial
TP114	0-10cm	4760	0.589644	23.1986	0.1401	0.856666	207.063	112.626	39.0141	0.24052	19963.9	573.317	26.33	45.5033	Steppe	Acid igneous rock
TP115	0-10cm	4721	1.91159	291.371	0.1712	1.02969	229.61	112.626	38.937	0.173122	15137.2	378.98	17.674	44.73	Steppe	Acid igneous rock
TP116	0-10cm	4669	2.18889	81.8699	0.1829	1.58109	279.667	112.626	30.7312	0.195308	28324.4	707.39	31.8933	60.6433	Steppe	Acid igneous rock
TP117	0-10cm	4660	0.979284	161.565	0.2206	1.508	337.252	112.626	71.3257	0.268807	17340	353.967	24.2333		Steppe	Acid igneous rock
TP118	0-10cm	4663	2.49536	29.7449	0.2664	1.98837	389.829	52.8704	21.432	0.12898	13616.5	515.535	23.92	43.22	Steppe	Acid igneous rock
TP119	0-10cm	4775	1.86402	355.236	0.2968	-0.694664	403.464	52.8704	49.001	0.242227	14620	354.573	20.6133		Steppe	Clastic sedimentary rock
TP120	0-10cm	4772	5.13378	111.161	0.3514	-0.0671913	460.722	92.0824	50.533	0.264292	11550	302.027	12.8833		Steppe	Clastic sedimentary rock
TP121	0-10cm	4657	1.79531	172.569	0.355	0.283649	461.028	92.0824	75.7633	0.53312	16079.1	392.573	19.87	33.9	Steppe	Acid igneous rock
TP122	0-10cm	4584	0.32849	225	0.3565	0.555071	453.348	92.0824	21.3441	0.134349	13153.1	348.587	10.61		Steppe	Acid igneous rock
TP123	0-10cm	4659	2.10529	287.103	0.3917	-0.836852	457.313	100.901	211.4	0.625939	22667.4	544.563	33.1333	47.095	Meadow	Acid metamorphic rock
TP124	0-10cm	4470	4.69912	46.3322	0.3753	0.544884	461.761	100.901	207.652	0.575707	14202.9	375.5	18.0467	28.76	Meadow	Acid metamorphic rock
TP125	0-10cm	4901	6.7973	3.90049	0.5883	-3.89469	564.216	100.901	224.002	0.69063	23744.2	605.793	33.45	48.88	Meadow	Fluvial
TP126	0-10cm	4451	20.1305	95.5004	0.7036	-1.8339	706.549	43.2088	236.184	0.720681	32860.4	708.687	37.74	71.26	Shrub	Fluvial
TP127	0-10cm	3784	6.58886	61.336	0.5002	4.06005	634.405	20.9465	512.989	0.767974	29590.8	688.393	36.6233	48.85	Forest	Acid igneous rock
TP128	0-10cm	4110	20.1697	212.989	0.6392	1.28211	661.239	20.9465	278.493	0.832492	27820.1	820.03	34.1233	68.27	Forest	Fluvial
TP129	0-10cm	3887	16.5163	47.5858	0.552	3.12549	600.948	28.6265	164.745	0.573287	34562.1	586.177	41.9133	89.35	Meadow	Acid igneous rock
TP130	0-10cm	4342	13.3956	35.7644	0.6851	-0.793863	606.364	24.8994	188.673	0.755121	30845.8	766.755	49.885	75.395	Meadow	Acid metamorphic rock
TP131	0-10cm	3351	15.9961	224.618	0.3959	6.84358	517.044	40.099	326.282	0.713369	28528.6	689.017	31.9567	71.1933	Shrub	Acid metamorphic rock
TP132	0-10cm	4058	13.6916	17.4299	0.3873	2.50616	543.414	14.9602	11.2576	0.148204	20091.3	619.983	19.1933		Steppe	Fluvial
TP133	0-10cm	3751	2.55456	181.736	0.5224	5.54995	783.058	14.9602	18.8165	0.0734347	19916.3	563.337	21.1933		Cropland	Fluvial
TP134	0-10cm	4378	1.55588	185.711	0.2026	0.372397	269.79	21.3991	13.5696	0.0978683	16795.4	526.27	17.04	35.38	Steppe	Fluvial
TP135	0-10cm	4710	2.04472	119.476	0.1345	-1.34462	185.123	21.3991	16.9236	0.119731	12794.1	326.69	12.55		Steppe	Acid igneous rock
TP136	0-10cm	4828	2.67125	280.008	0.1237	-2.31533	167.852	53.9345	21.1297	0.220174	14348.4	344.43	16.0567	33.73	Steppe	Clastic sedimentary rock
TP137	0-10cm	4646	4.83739	308.517	0.103	-1.02227	144.807	53.9345	27.2744	0.178716	19428.7	532.407	22.78	43.225	Steppe	Acid igneous rock
TP138	0-10cm	5005	5.5455	81.1932	0.129	-3.19311	155.71	53.9345	29.4198	0.191289	22803.6	660.087	27.5767	37.02	Steppe	Clastic sedimentary rock
TP139	0-10cm	4772	0.489678	161.565	0.0832	-0.995046	109.22	71.309	22.9007	0.170387	16504.6	496.227	22.62		Steppe	Acid igneous rock
TP140	0-10cm	4510	1.62737	244.654	0.0699	1.06359	95.7177	71.309	31.8149	0.208152	11522.5	385.35	13.21		Steppe	Acid igneous rock
TP141	0-10cm	4782	2.2773	350.218	0.0859	-0.743556	110.457	71.309	30.605	0.159373	15404.4	402.053	19.4733		Steppe	Acid igneous rock
TP142	0-10cm	5015	1.80529	59.0362	0.0963	-2.31408	117.271	112.626	49.5959	0.272127	22534.5	578.77	33.0433	48.17	Steppe	Acid igneous rock
TP143	0-10cm	5107	2.36745	168.69	0.1258	-2.52342	158.419	112.626	54.1759	0.278677	11257	317.45	15.4333		Meadow	Acid igneous rock
TP144	0-10cm	4941	0.882731	164.745	0.1019	-1.9506	135.302	112.626	31.6809	0.181795	16437.9	401.103	21.1433		Steppe	Acid igneous rock
TP145	0-10cm	4654	0.833853	158.199	0.1223	0.729128	184.176	112.626	26.4997	0.160873	16146.7	370.337	18.4933		Steppe	Acid igneous rock
TP146	0-10cm	4614	1.64202	8.1301	0.147	0.98507	224.8	112.626	36.2548	0.178882	14246	364.547	19.1467		Steppe	Acid igneous rock
TP147	0-10cm	4536	1.18423	11.3099	0.1759	1.90876	281.62	112.626	29.1884	0.180494	17008.1	406.287	17.4367		Steppe	Fluvial
TP148	0-10cm	4501	1.20926	309.806	0.1908	2.16291	309.093	112.626	20.4938	0.155661	20798.7	517.13	23.57		Steppe	Clastic sedimentary rock
TP149	0-10cm	4657	2.79587	165.579	0.2307	1.45644	357.752	52.8704	29.2516	0.180131	22053.3	657.628	26.4983	60.155	Steppe	Acid igneous rock
TP150	0-10cm	4567	1.03289	347.005	0.2704	1.93508	414.641	52.8704	41.2404	0.19215	13459.1	381.58	17.1633		Steppe	Acid igneous rock
TP151	0-10cm	4612	0.547473	81.8699	0.3052	1.36163	452.534	92.0824	44.0942	0.22989	18373.7	416.82	23.7767	33.6	Steppe	Acid igneous rock
TP152	0-10cm	4583	0.656959	225	0.3325	1.41563	470.761	92.0824	40.4204	0.337265	10309.9	319.247	15.2767		Steppe	Fluvial
TP153	0-10cm	4726	3.88238	347.347	0.3519	-1.05699	455.483	92.0824	55.7623	0.404799	18625.6	412.597	17.11	36.12	Steppe	Fluvial
TP154	0-10cm	4816	3.08052	28.4956	0.4151	-2.18185	458.573	99.6357	93.1502	0.479363	19253.5	458.32	21.91	38.44	Steppe	Fluvial
TP155	0-10cm	4564	2.47611	90	0.3548	0.00817153	444.303	100.901	158.965	0.603455	24454.8	650.11	22.64	58.24	Meadow	Acid metamorphic rock
TP156	0-10cm	4619	1.53651	229.086	0.3805	-0.897245	448.399	99.6357	151.393	0.582067	18049.4	501.557	24.49		Meadow	Fluvial
TP157	0-10cm	4632	7.19298	167.005	0.3968	-1.15862	459.592	100.901	237.784	0.626941	21903.9	583.96	24.2667	52.31	Meadow	Acid metamorphic rock
TP158	0-10cm	4243	6.26979	58.0693	0.4162	1.63066	525.083	100.901	229.108	0.614183	27908.4	1150.87	36.51	45.8	Meadow	Clastic sedimentary rock
TP159	0-10cm	4611	4.33863	355.914	0.5876	-2.40969	592.96	43.2088	146.15	0.590961	32635.5	662.557	33.5833	70.6	Meadow	Acid metamorphic rock
TP160	0-10cm	4044	11.5393	358.103	0.5027	1.867	622.718	24.346	302.621	0.745035	31591.8	688.2	31.59	80.44	Shrub	Fluvial
TP161	0-10cm	4502	9.84284	175.533	0.7003	-2.2098	654.247	42.0665	224.11	0.711641	27086.5	503.675	28.11	54.06	Shrub	Clastic sedimentary rock
TP162	0-10cm	4192	8.18749	5.38931	0.6295	0.268304	652.409	24.346	344.381	0.773865	37899.6	965.763	46.7267	95.0733	Shrub	Fluvial
TP163	0-10cm	4893	16.9826	219.254	0.9599	-4.85906	663.675	28.6265	162.675	0.441861	38827.7	775.18	41.6133	78.2633	Meadow	Clastic sedimentary rock
TP164	0-10cm	4163	11.4464	191.16	0.5373	1.3741	579.4	20.4495	234.787	0.724606	25457.7	600.477	38.12	49	Meadow	Acid metamorphic rock
TP165	0-10cm	3442	2.95382	135	0.4279	6.00626	522.851	40.099	508.455	0.783558	30563	843.493	39.7267	63.7233	Forest	Acid metamorphic rock
TP166	0-10cm	4612	1.73079	169.695	0.1892	-2.59112	233.497	14.9602	31.769	0.173197	23258.9	525.525	25.6775	56.8175	Steppe	Clastic sedimentary rock
TP167	0-10cm	4487	5.28628	353.29	0.2199	-1.20262	283.451	14.9602	54.0297	0.237168	4927.21	253.97	13.4333		Steppe	Clastic sedimentary rock
TP168	0-10cm	4360	5.67526	202.38	0.0716	0.522283	112.526	21.3991	11.7275	0.180565	12202.2	435.02	17.38		Cropland	Fluvial
TP169	0-10cm	4786	1.03867	26.5651	0.0844	-2.79925	122.967	21.3991	19.5548	0.151948	24274.4	781.32	24.46	57.695	Steppe	Fluvial
TP170	0-10cm	4520	1.5788	191.31	0.0696	-0.677974	107.75	53.9345	28.3431	0.153457	14104.5	410.913	16.17		Steppe	Acid igneous rock
TP171	0-10cm	4716	0.797106	119.055	0.0912	-1.21822	129.924	53.9345	21.7767	0.144059	13605.1	407.067	15.96		Steppe	Acid igneous rock
TP172	0-10cm	4444	0.734494	288.435	0.0694	0.914025	107.353	53.9345	20.0731	0.118599	13257.8	398.725	16.245		Steppe	Acid igneous rock
TP173	0-10cm	4458	2.03592	8.74616	0.06	1.14911	89.1147	53.9345	84.138	0.281592	28948.8	679.173	25.32	46.315	Steppe	Clastic sedimentary rock
TP174	0-10cm	4560	2.30082	227.726	0.0574	0.409509	81.3364	71.309	33.9277	0.191557	28152.2	601.937	28.03	44.95	Steppe	Acid igneous rock
TP175	0-10cm	4776	6.35111	209.055	0.0574	-0.747372	75.8648	71.309	25.0443	0.160723	29687.2	657.387	29.8933	44.665	Steppe	Clastic sedimentary rock
TP176	0-10cm	4701	10.1605	336.915	0.0699	-0.186063	89.3436	71.309	35.3977	0.197149	12420.5	377.313	16.66		Steppe	Clastic sedimentary rock
TP177	0-10cm	4419	1.31374	45	0.0716	1.64183	98.7272	71.309	20.4883	0.142236	23334.5	570.17	27.9633		Steppe	Acid igneous rock
TP178	0-10cm	4601	1.489	351.027	0.0768	0.893152	107.476	71.309	32.4377	0.142007	18722.4	464.324	22.528		Steppe	Acid igneous rock
TP179	0-10cm	4637	0.882731	254.745	0.1271	0.767499	198.35	112.626	22.4766	0.181656	25026.4	608.257	27.0033	53.53	Steppe	Acid igneous rock
TP180	0-10cm	4566	1.1272	164.055	0.1721	1.64757	276.075	112.626	28.7809	0.167908	21516.3	433.08	22.65	30.505	Steppe	Acid igneous rock
TP181	0-10cm	4739	2.34205	172.405	0.2071	-0.327412	305.759	112.626	25.0931	0.186177	18167.8	467.44	20.5067		Steppe	Acid igneous rock
TP182	0-10cm	4775	1.32283	159.444	0.2196	-0.458317	313.964	112.626	25.941	0.164159	25749.7	532.297	24.88	60.455	Steppe	Acid igneous rock
TP183	0-10cm	4909	2.55456	181.736	0.2899	-2.1635	383.457	92.0824	45.83	0.266075	21239.5	506.263	24.13	36.24	Steppe	Fluvial
TP184	0-10cm	4666	2.30082	199.654	0.2785	0.632993	413.029	112.626	30.544	0.181381	17137.7	427.01	19.875		Steppe	Eolean
TP185	0-10cm	4625	0.979284	198.435	0.3138	-0.0457951	421.624	92.0824	20.6821	0.0888976	27129	560.043	31.5233	39.35	Steppe	Eolean
TP186	0-10cm	4708	2.44696	325.305	0.3732	-1.25634	451.433	92.0824	75.8189	0.28067	10925.5	346.44	11.7867		Steppe	Clastic sedimentary rock
TP187	0-10cm	4753	5.09668	0	0.3907	-2.33866	453.575	99.6357	83.468	0.402761	18167.9	406.047	22.6967	35.49	Meadow	Acid igneous rock
TP188	0-10cm	4745	3.04738	156.038	0.4214	-2.47208	453.261	99.6357	152.577	0.566155	15106.5	430.22	17.1133	35.4	Meadow	Acid metamorphic rock
TP189	0-10cm	4737	2.32153	216.87	0.4342	-2.45162	467.868	99.6357	203.916	0.659756	20102.1	551.887	20.83	49.015	Meadow	Acid metamorphic rock
TP190	0-10cm	4307	1.61629	73.3008	0.4711	-0.172892	556.687	42.0665	290.888	0.673424	27134.8	649.273	26.8567	64.8333	Meadow	Acid metamorphic rock
TP191	0-10cm	4122	13.2353	88.6831	0.4784	1.81217	589.886	42.0665	238.998	0.582363	18775.5	504.1	17.8033	43.4067	Shrub	Fluvial
TP192	0-10cm	4164	1.11652	123.69	0.5239	1.11967	578.949	60.9028	349.833	0.625806	15192.6	531.093	18.7667	32.63	Meadow	Acid metamorphic rock
TP193	0-10cm	4586	1.8832	260.538	0.6658	-2.18944	614.008	20.4495	195.599	0.699241	35476.6	751.793	27.2933	76.4	Meadow	Acid metamorphic rock
TP194	0-10cm	4012	3.70002	153.97	0.5231	1.64522	568.56	20.4495	340.681	0.693149	18198.1	415.753	24.1633	44.51	Shrub	Acid igneous rock
TP195	0-10cm	3900	10.5364	305.538	0.4646	3.87663	540.23	20.4495	283.516	0.740804	28665	610.197	32.5533		Shrub	Acid igneous rock
TP196	0-10cm	4424	2.45915	114.146	0.0623	0.234085	97.9982	21.3991	17.4996	0.103901	13219.7	361.54	13.6133		Steppe	Fluvial
TP197	0-10cm	4736	3.31032	52.5946	0.0659	-2.81265	97.2041	53.9345	11.6906	0.194594	16792.6	419.903	20.0467		Steppe	Clastic sedimentary rock
TP198	0-10cm	4504	0.902868	149.036	0.0467	0.169994	81.8718	53.9345	2.07763	0.0538598	34575.8	756.108	31.7983	55.75	Steppe	Fluvial
TP199	0-10cm	4651	4.69912	242.592	0.0494	-0.55909	75.7378	53.9345	18.327	0.177547	32335.3	747.135	25.385	109.013	Steppe	Acid igneous rock
TP200	0-10cm	4818	5.08036	250.463	0.0548	-2.2323	72.3797	71.309	33.3273	0.203533	24353.1	671.443	27.15	52.34	Steppe	Clastic sedimentary rock
TP201	0-10cm	4719	0.61939	0	0.0521	-0.94019	71.3621	71.309	25.1482	0.170481	22985.2	527.79	24.15	34.61	Steppe	Acid igneous rock
TP202	0-10cm	4837	0.979284	288.435	0.0644	-2.02806	81.1282	71.309	24.5769	0.171573	23521.1	490.697	21.2733	42.765	Steppe	Clastic sedimentary rock
TP203	0-10cm	4898	0.32849	225	0.0689	-2.32521	86.0338	71.309	31.6647	0.183148	19452.2	467.047	20.37		Steppe	Acid igneous rock
TP204	0-10cm	4968	0.61939	0	0.079	-3.04823	97.9349	71.309	33.5475	0.203547	16461	394.067	15.43		Steppe	Clastic sedimentary rock
TP205	0-10cm	4888	1.54816	36.8699	0.1234	-2.25407	165.548	112.626	33.612	0.189006	17570	477.84	18.6633		Steppe	Clastic sedimentary rock
TP206	0-10cm	4918	0.875915	315	0.2335	-2.40959	308.648	112.626	35.9954	0.187452	19933.7	467.11	20.0967		Steppe	Fluvial
TP207	0-10cm	4966	2.74409	229.574	0.2868	-3.06895	363.218	92.0824	44.279	0.258734	18165	515.143	24.2033		Steppe	Clastic sedimentary rock
TP208	0-10cm	5053	2.0564	109.799	0.3088	-4.41772	359.117	92.0824	22.9178	0.240995	33842.3	811.313	31.5533	70.1167	Steppe	Acid igneous rock
TP209	0-10cm	4953	2.30082	19.6538	0.3447	-3.6386	407.381	92.0824	33.1231	0.244304	17937.6	502.247	20.91		Steppe	Clastic sedimentary rock
TP210	0-10cm	4846	0.855143	84.8056	0.3815	-3.03955	427.923	99.6357	31.963	0.189324	17968.6	524.21	19.17		Steppe	Clastic sedimentary rock
TP211	0-10cm	4758	1.91159	148.241	0.3734	-2.29801	429.643	99.6357	56.9776	0.318124	19271.9	446.41	21.8167		Steppe	Clastic sedimentary rock
TP212	0-10cm	4888	0.882731	217.875	0.4155	-4.0622	424.979	99.6357	38.8165	0.199113	6488.61	247.41	12.2567		Meadow	Clastic sedimentary rock
TP213	0-10cm	4998	1.0783	111.038	0.4667	-5.13779	439.276	99.6357	35.6941	0.236815	18897.9	393.147	18.5067	52.29	Meadow	Fluvial
TP214	0-10cm	5220	2.6352	229.764	0.592	-7.82814	460.953	22.6608	44.0433	0.277535	31510.4	798.917	28.3033	61.22	Meadow	Acid igneous rock
TP215	0-10cm	4982	1.42738	310.601	0.5062	-5.47532	459.127	22.6608	87.6185	0.444131	17726.9	432.477	20.2867	36.9	Meadow	Fluvial
TP216	0-10cm	4401	5.83659	24.1932	0.5616	-1.84255	547.272	60.9028	147.783	0.626825	24192.6	608.877	32.8033	47.68	Meadow	Fluvial
TP217	0-10cm	4371	6.24717	180.707	0.547	-0.381482	570.297	60.9028	291.587	0.788671	11889.2	393.84	12.52		Meadow	Fluvial
TP218	0-10cm	3970	4.19924	276.34	0.5031	0.497362	541.371	60.9028	219.574	0.744949	15443	463.957	22.23		Meadow	Acid metamorphic rock
TP219	0-10cm	3955	6.45516	60.6795	0.4777	2.16059	554.829	25.6229	374.035	0.750937	20738.4	569.567	27.5167	52.8833	Shrub	Carbonate rock
TP220	0-10cm	4291	3.57044	17.6501	0.6572	-2.42782	590.667	25.6229	269.528	0.822477	18978.1	441.463	29.3167	38.785	Shrub	Clastic sedimentary rock
TP221	0-10cm	3517	13.3105	178.363	0.4306	3.0289	511.636	25.1444	262.545	0.508744	12175.5	360.26	17.0833		Shrub	Clastic sedimentary rock
TP222	0-10cm	4454	4.91652	133.727	0.7129	-4.12062	597.335	2.43708	353.314	0.781734	23435.4	572.323	42.79	65.7	Meadow	Clastic sedimentary rock
TP223	0-10cm	4186	11.1405	136.668	0.5578	-0.506444	581.486	2.43708	358.907	0.83194	28483.7	676.37	38.6967	56.9533	Meadow	Clastic sedimentary rock
TP224	0-10cm	3932	18.1161	282.888	0.4908	1.69385	566.099	2.43708	421.942	0.712285	22821.5	482.253	27.3233	41.21	Meadow	Fluvial
TP225	0-10cm	3696	6.1125	317.045	0.7423	0.798338	774.852	19.9488	353.23	0.83887	25404.1	486.637	32.63	48.62	Shrub	Clastic sedimentary rock
TP226	0-10cm	4358	5.95588	286.557	0.0424	-1.60021	67.0113	34.4523	16.0122	0.178907	13239.6	492.215	18.9133		Desert	Fluvial
TP227	0-10cm	4352	5.94495	182.231	0.0379	-0.402164	56.4058	34.4523	33.1614	0.206365	28233.4	826.943	25.7567	54.64	Steppe	Fluvial
TP228	0-10cm	4478	3.37636	290.095	0.027	-0.690221	46.6306	34.4523	23.9	0.140447	16756.7	451.67	17.97		Steppe	Fluvial
TP229	0-10cm	4565	0.882731	344.745	0.0351	-0.937436	57.8212	34.4523	15.3129	0.117999	39863.4	855.833	30.5133	66.0833	Steppe	Fluvial
TP230	0-10cm	4683	3.17219	45	0.0426	-1.24604	67.598	34.4523	17.4873	0.131156	30248.2	816.72	29.2667	63.36	Steppe	Fluvial
TP231	0-10cm	4477	0.309704	90	0.0416	0.489027	63.1284	71.309	17.6938	0.116601	13391.4	453.74	16.6233		Steppe	Acid igneous rock
TP232	0-10cm	4873	2.28517	298.301	0.0619	-2.85839	76.3036	71.309	33.5756	0.188115	22080.8	522.003	26.0467		Steppe	Clastic sedimentary rock
TP233	0-10cm	4568	1.85759	90	0.1112	0.204256	162.505	112.626	10.8196	0.309383	35293.8	937.157	37.0967	84.46	Steppe	Acid igneous rock
TP234	0-10cm	5150	4.10751	340.201	0.2518	-5.18221	287.906	112.626	42.796	0.269849	19075.8	460.487	20.07	38.85	Steppe	Clastic sedimentary rock
TP235	0-10cm	4915	1.75484	138.576	0.2493	-2.6897	317.38	92.0824	36.4126	0.231378				39.61	Steppe	Acid igneous rock
TP236	0-10cm	4592	5.03461	122.471	0.5182	-2.61807	511.895	60.9028	157.99	0.666415	16533.1	452.25	14.81		Meadow	Fluvial
TP237	0-10cm	4372	1.5788	168.69	0.5134	-1.49272	522.542	60.9028	193.8	0.576209	24077.5	598.658	35.72	65.785	Meadow	Fluvial
TP238	0-10cm	5022	10.872	87.5805	0.9026	-4.7725	668.1	28.6265	181.703	0.575631	32824.2	849.24	50.2467	97.87	Shrub	Acid metamorphic rock
TP239	0-10cm	4305	5.91706	309.71	0.5876	-2.04298	575.784	60.9028	272.602	0.800807	26965.2	522.897	29.3333	45.895	Shrub	Acid metamorphic rock
TP240	0-10cm	4337	5.89203	45	0.5707	-1.77971	563.615	25.6229	308.362	0.587648	24738.3	571.423	32.18	49.43	Meadow	Clastic sedimentary rock
TP241	0-10cm	3879	19.675	6.29237	0.4938	0.633563	537.929	25.1444	340.574	0.751258	29435	757.71	34.41	58.6767	Meadow	Acid igneous rock
TP242	0-10cm	4191	2.3497	197.241	0.5519	-0.931379	557.65	2.43708	387.767	0.837063	21807.2	451.787	28.65	72.965	Meadow	Fluvial
TP243	0-10cm	4029	2.55456	215.134	0.4735	0.689681	538.008	2.43708	344.35	0.762519	24531	581.703	28.2033	51.8867	Meadow	Clastic sedimentary rock
TP244	0-10cm	4191	3.17219	181.397	0.6075	-2.16507	577.85	2.43708	323.932	0.717139	23789.4	411.3	31.0933	60.4433	Meadow	Clastic sedimentary rock
TP245	0-10cm	4157	15.1507	62.6676	0.6346	-1.72171	624.32	40.3805	312.325	0.738656	31939.9	952.68	37.2025	67.5575	Meadow	Clastic sedimentary rock
TP246	0-10cm	4336	5.28179	232.125	0.8361	-3.43939	728.393	40.3805	264.193	0.685117	40789.6	778.693	35.1667	85.0333	Meadow	Clastic sedimentary rock
TP247	0-10cm	4399	10.1695	149.184	0.3167	1.79617	346.421	14.4765	27.6994	0.292183	23565	432.867	28.95		Meadow	Acid metamorphic rock
TP248	0-10cm	3753	11.8361	253.902	0.7157	0.453054	752.604	70.5453	405.582	0.805294	25727.3	574.697	30.9467	54.3467	Meadow	Clastic sedimentary rock
TP249	0-10cm	4265	2.15028	239.744	0.0275	0.870599	42.108	34.4523	11.8452	0.110865	13141.6	334.887	13.6533		Desert	Fluvial
TP250	0-10cm	4543	1.91472	165.964	0.0213	0.649754	37.9808	34.4523	16.3393	0.113534	18237.3	440.642	21.1883		Desert	Fluvial
TP251	0-10cm	4692	0.797106	60.9454	0.3388	0.665728	367.644	17.0857	34.1467	0.19911	4385.32	108.94	17.3633		Steppe	Acid igneous rock
TP252	0-10cm	4687	0.797106	299.055	0.0262	-2.35875	42.6752	34.4523	19.9336	0.122486	18138.3	481.797	20.1567		Steppe	Fluvial
TP253	0-10cm	4394	2.42979	9.16235	0.3577	2.44631	434.271	17.0857	46.6018	0.200519	3588.79	51.05	15.4533		Steppe	Acid metamorphic rock
TP254	0-10cm	4307	1.17916	23.1986	0.4043	2.7703	503.112	33.9144	47.0759	0.202052	6941.7	331.24	16.26		Steppe	Eolean
TP255	0-10cm	4918	3.17971	265.815	0.3467	-5.56505	334.432	22.6608	83.5145	0.345338	19579.9	650.41	29.7633		Meadow	Acid igneous rock
TP256	0-10cm	4814	3.18909	309.094	0.3399	-4.31696	347.646	22.6608	139.313	0.503422	18145.6	457.62	29.3067		Meadow	Acid igneous rock
TP257	0-10cm	4305	7.79274	99.0903	0.4003	2.67186	501.217	33.9144	32.1159	0.257112	24505.5	319.583	27.56	75.5267	Steppe	Eolean
TP258	0-10cm	4359	3.66603	62.354	0.4497	-1.76968	499.066	138.876	358.603	0.749257	17121.2	413.875	21.9925		Meadow	Carbonate rock
TP259	0-10cm	4437	2.41002	222.397	0.5978	-3.80365	557.229	138.876	295.746	0.750969	21000.6	509.92	30.0033	47.26	Meadow	Carbonate rock
TP260	0-10cm	4311	4.86676	234.039	0.5249	-2.81293	546.589	25.1444	298.365	0.728254	29116.5	654.703	32.5967	63.49	Shrub	Clastic sedimentary rock
TP261	0-10cm	4425	5.26943	39.0531	0.5871	-3.99445	563.231	25.1444	302.982	0.66393	21090.9	493.817	29.1733	50.385	Meadow	Fluvial
TP262	0-10cm	4034	11.1966	55.008	0.547	-0.943032	584.556	40.3805	323.112	0.813739	28252.3	639.677	28.6133	52.46	Meadow	Clastic sedimentary rock
TP263	0-10cm	3962	1.18423	101.31	0.5341	-0.0417678	597.2	91.0087	257.576	0.666408	20549.6	442.58	25.9333	44.6167	Meadow	Fluvial
TP264	0-10cm	3898	3.33188	201.801	0.6029	-0.48028	658.806	91.0087	352.522	0.680089	18540.2	397.44	23.5567	45.14	Shrub	Clastic sedimentary rock
TP265	0-10cm	4370	3.2631	275.44	0.2994	2.28648	383.065	33.2614	40.8258	0.162465	15113.2	346.766	23.68	43.605	Steppe	Acid metamorphic rock
TP266	0-10cm	3735	10.0689	323.043	0.6785	0.121211	728.768	91.0087	319.405	0.777596	21291	527.05	33.2367	39.58	Shrub	Clastic sedimentary rock
TP267	0-10cm	3778	12.9394	76.0455	0.7851	-0.14125	803.281	70.5453	389.755	0.814568	22387.6	572.8	29.7967	42.1167	Meadow	Clastic sedimentary rock
TP268	0-10cm	5151	1.14304	208.301	0.0444	-6.75602	34.3179	34.4523	17.3395	0.141437	21586.4	490.173	20.16		Steppe	Fluvial
TP269	0-10cm	4667	5.02871	227.49	0.2131	-0.19002	251.081	33.2614	57.265	0.403887	38441.9	849.93	34.485	69.3075	Meadow
TP270	0-10cm	4133	3.6103	279.866	0.216	4.00637	302.654	24.7041	49.4716	0.326892	45602.1	919.98	41.3067	89.01	Steppe	Fluvial
TP271	0-10cm	4696	4.6674	167.574	0.2775	-4.01702	291.481	22.6608	39.6127	0.283141	16063.3	453.56	21.4033		Steppe	Acid igneous rock
TP272	0-10cm	4578	2.94572	166.329	0.2592	-3.03699	283.908	22.6608	52.5174	0.238655	10832.9	340.463	19.4		Meadow	Acid igneous rock
TP273	0-10cm	4508	1.37174	196.39	0.2555	-2.41267	290.256	138.876	26.1597	0.186603	13636.3	462.197	29.3333		Meadow	Acid igneous rock
TP274	0-10cm	4509	6.6926	308.454	0.2967	-2.51467	329.379	138.876	31.5126	0.297895	15124.2	430.395	24.8217		Meadow	Acid igneous rock
TP275	0-10cm	4605	7.08109	14.4898	0.3449	-3.24461	361.44	138.876	87.2712	0.489317	17086.2	454.377	29.17		Meadow	Fluvial
TP276	0-10cm	4529	3.28316	316.909	0.4195	-3.56974	414.214	138.876	186.838	0.576159	18995.7	451.39	25.07		Meadow	Fluvial
TP277	0-10cm	4685	0.244843	288.435	0.5257	-5.01328	466.331	138.876	233.214	0.66866	17247.2	443.653	33.73		Meadow	Fluvial
TP278	0-10cm	4357	1.35416	210.964	0.404	-2.63735	447.403	66.8548	163.782	0.582274	19831	445.508	27.2833	40.16	Meadow	Carbonate rock
TP279	0-10cm	4321	11.6863	186.754	0.4842	-2.82811	501.992	66.8548	189.651	0.622892	22712.9	520.69	29.0533	41.41	Meadow	Fluvial
TP280	0-10cm	4177	9.33152	78.1356	0.463	-2.52671	500.624	25.1444	205.946	0.758001	20050.4	444.412	31.648	37.15	Shrub	Clastic sedimentary rock
TP281	0-10cm	4606	2.3395	145.784	0.6244	-5.79321	548.558	25.1444	264.683	0.729916	17693.6	429.453	26.4667	39.405	Steppe	Clastic sedimentary rock
TP282	0-10cm	4638	2.40007	88.1524	0.6101	-6.09808	518.028	18.0138	198.751	0.551254	24077.5	629.587	30.5833	54.33	Meadow	Clastic sedimentary rock
TP283	0-10cm	4348	1.97322	48.1798	0.4434	-4.05267	449.138	18.0138	245.829	0.690488	27011.5	684.57	30.27	59.4133	Meadow	Acid igneous rock
TP284	0-10cm	4216	3.93724	133.409	0.4474	-2.652	472.905	18.0138	104.861	0.534759	21513	508.913	25.5867	34.5	Meadow	Acid igneous rock
TP285	0-10cm	4229	0.46455	0	0.5416	-3.73529	543.972	5.44354	274.311	0.687205	16486	530.99	22.5233	34.47	Meadow	Clastic sedimentary rock
TP286	0-10cm	4189	3.10946	275.711	0.5992	-2.38183	613.431	91.0087	310.171	0.670652	23265.5	518.743	28.3	57.0533	Shrub	Carbonate rock
TP287	0-10cm	3924	6.65732	47.8156	0.6051	-1.83442	636.49	5.44354	320.665	0.842032	24677	655.717	39.3467	47.01	Shrub	Clastic sedimentary rock
TP288	0-10cm	4552	7.16026	211.809	0.2313	1.42678	301.224	32.658	59.897	0.458247	15763.5	284.147	18.49		Steppe	Fluvial
TP289	0-10cm	3835	5.35312	213.232	0.626	-0.825892	675.511	91.0087	366.944	0.781422	20879.9	399.71	22.62	40.58	Meadow	Clastic sedimentary rock
TP290	0-10cm	3480	3.87777	246.501	0.6042	1.13063	701.664	16.0429	403.141	0.820228	24947.9	584.157	28.1533	41.435	Shrub	Fluvial
TP291	0-10cm	3718	4.72936	51.6325	0.694	-0.346074	724.999	16.0429	388.856	0.840374	26843.6	656.91	33.4533	64.3333	Meadow	Clastic sedimentary rock
TP292	0-10cm	5131	4.80784	156.318	0.0384	-6.23956	22.6426	34.4523	10.959	0.120785	27621.1	679.06	30.5333	50.0433	Desert	Fluvial
TP293	0-10cm	5158	3.81893	338.629	0.0381	-7.13743	25.3569	34.4523	22.1243	0.172176	27442.1	639.287	36.2067		Desert	Fluvial
TP294	0-10cm	4539	3.23186	201.038	0.2377	1.92739	308.67	20.4558	127.392	0.401486	40760	1084.34	34.765	105.505	Steppe	Fluvial
TP295	0-10cm	4828	5.42021	63.7999	0.2639	-0.367724	301.404	20.4558	102.163	0.331777	48785.9	586.71	36.1033	95.4	Shrub	Fluvial
TP296	0-10cm	4738	5.35423	151.587	0.3078	-4.74785	311.809	138.876	66.029	0.3744	16172.9	453.477	20.12		Steppe	Acid igneous rock
TP297	0-10cm	4279	3.8747	208.61	0.271	-1.96812	313.647	66.8548	67.9446	0.358418	15814.5	408.827	19.3867		Steppe	Fluvial
TP298	0-10cm	4438	6.96817	18.0343	0.2355	2.08947	291.816	12.51	62.6071	0.338182	34791.6	655.413	32.5533	79.31	Meadow	Acid metamorphic rock
TP299	0-10cm	4234	3.89311	6.84277	0.3181	-1.73238	368.919	66.8548	147.94	0.444131	16969.8	453.583	17.3233	41.49	Meadow	Carbonate rock
TP300	0-10cm	4366	11.9649	322.253	0.3832	-3.17485	405.939	66.8548	142.69	0.500431	22477.7	557.827	26.15	56.24	Meadow	Fluvial
TP301	0-10cm	4558	0.309704	90	0.4324	-5.25848	420.103	25.1444	137.518	0.489289	20703.6	536.293	24.5067	43.32	Meadow	Carbonate rock
TP302	0-10cm	4355	5.91706	39.7099	0.4057	-4.23094	421.975	18.0138	112.163	0.482853	20873.3	1436.37	21.31	40.58	Meadow	Clastic sedimentary rock
TP303	0-10cm	4276	1.42318	112.38	0.3395	-3.3686	380.737	18.0138	81.0998	0.50674	17523.3	454.247	23.4014	34.88	Meadow	Carbonate rock
TP304	0-10cm	4256	5.32426	209.539	0.3452	-3.15612	378.557	18.0138	42.8046	0.348023	47042.6	943.847	31.3533	121.7	Meadow	Acid igneous rock
TP305	0-10cm	4215	0.489678	198.435	0.3351	-3.04645	375.693	18.0138	54.4988	0.256688	18068.5	420.003	18.94		Meadow	Acid igneous rock
TP306	0-10cm	4030	14.1587	82.3039	0.4411	-2.97415	473.697	5.44354	270.695	0.613701	22540	638.01	24.5267	43.16	Shrub	Acid igneous rock
TP307	0-10cm	3827	20.4719	55.6197	0.4173	-0.639543	499.08	5.44354	286.585	0.648053	22683.3	540.403	25.5933	51.2033	Shrub	Clastic sedimentary rock
TP308	0-10cm	3612	4.04616	316.548	0.5048	-0.0617018	583.855	5.44354	353.549	0.759987	22430.8	551.32	32.13	52.2033	Shrub	Clastic sedimentary rock
TP309	0-10cm	3386	6.13275	230.102	0.4704	2.19025	600.53	136.682	329.678	0.61259	22352.9	520.123	22.4633	44.015	Meadow	Acid igneous rock
TP310	0-10cm	3513	5.72611	52.6668	0.5957	0.784059	670.2	16.0429	423.356	0.819232	26674.3	671.663	30.4033	57.0467	Meadow	Fluvial
TP311	0-10cm	3650	3.52674	307.875	0.5932	0.233531	663.999	16.0429	416.096	0.794952	26152.2	636.647	30.7533	54.2933	Meadow	Clastic sedimentary rock
TP312	0-10cm	4577	2.31895	205.71	0.2603	-3.74814	282.022	66.8548	33.909	0.252226	14883.8	425.827	18.2533	45.03	Steppe	Acid igneous rock
TP313	0-10cm	4585	1.10031	309.289	0.2606	-4.34177	272.578	138.876	34.553	0.196007	7213.5	235.86	8.74667		Steppe	Fluvial
TP314	0-10cm	4484	0.638451	165.964	0.2212	-4.04782	257.513	66.8548	16.7616	0.129916	16331.4	410.013	18.7333	42.87	Steppe	Fluvial
TP315	0-10cm	4438	1.11652	303.69	0.2368	-3.12457	268.675	66.8548	83.8587	0.357977	18886.2	643.96	23.03	41.08	Meadow	Fluvial
TP316	0-10cm	4454	12.5794	11.1738	0.2498	-3.42273	311.224	66.8548	84.7834	0.515345	23880.4	567.47	25.2333	43.8233	Meadow	Acid igneous rock
TP317	0-10cm	4305	1.09485	171.87	0.3264	-3.63465	366.418	18.0138	66.3116	0.318665	14702.6	391.59	15.2933		Meadow	Fluvial
TP318	0-10cm	4114	2.10529	252.897	0.3115	-2.91071	361.228	18.0138	81.113	0.360431	19963.5	478.453	23.3833		Steppe	Carbonate rock
TP319	0-10cm	4100	0.346259	206.565	0.3522	-3.42418	393.817	18.0138	68.9813	0.308599	21792	459.003	20.97	38.04	Steppe	Carbonate rock
TP320	0-10cm	4292	11.9195	177.064	0.4824	-5.61148	460.878	147.611	84.3385	0.521138	22619.4	549.47	24.65	38.64	Steppe	Carbonate rock
TP321	0-10cm	2894	3.17971	228.945	0.2945	5.01661	447.449	136.682	100.567	0.399029	22447.3	536.257	25.25	39.56	Steppe	Clastic sedimentary rock
TP322	0-10cm	3309	0.66602	324.462	0.4021	2.26763	540.444	136.682	310	0.630393	22258.7	525.847	27.0867	46.33	Steppe	Eolean
TP323	0-10cm	3541	5.04285	27.3499	0.4875	0.511264	588.55	58.1584	342.407	0.777607	23850.6	505.367	27.0967		Meadow	Eolean
TP324	0-10cm	3147	15.2711	125.735	0.5623	1.45193	636.595	58.1584	366.141	0.802802	24156	686.427	43.4133	45.88	Forest	Eolean
TP325	0-10cm	3268	4.63803	299.982	0.5351	1.61257	618.508	22.7971	377.939	0.804057	24780.3	546.05	27.5567	64.275	Meadow	Eolean
TP326	0-10cm	4638	0.77422	126.87	0.275	-6.38867	256.561	22.6608	43.8622	0.236809	27117.1	628.91	28.328	50.43	Meadow	Carbonate rock
TP327	0-10cm	4553	6.11733	23.0089	0.243	-5.19192	239.323	22.6608	21.9188	0.328646	23376.4	520.063	26.9967	46.0833	Meadow	Acid igneous rock
TP328	0-10cm	3501	4.4053	142.125	0.0694	1.6368	105.054	22.6608	15.0132	0.0808206	22015.4	558.023	25.0733		Desert	Fluvial
TP329	0-10cm	3610	12.1977	47.5336	0.2127	-0.497326	293.556	45.7133	28.4393	0.205109	24254.1	617.64	28.58		Steppe	Acid igneous rock
TP330	0-10cm	3976	8.41568	309.068	0.299	-3.5157	359.856	45.7133	74.3006	0.480051	24885.7	578.513	28.1467	49.4933	Meadow	Carbonate rock
TP331	0-10cm	3883	3.45842	190.305	0.3327	-1.59845	408.877	147.611	123.934	0.451281	19765.2	494.72	21.38		Steppe	Carbonate rock
TP332	0-10cm	3458	4.44829	162.824	0.3023	1.76998	427.93	147.611	223.122	0.584881	20010.9	509.443	22.1067		Steppe	Eolean
TP333	0-10cm	3098	8.9881	250.017	0.293	4.06099	435.752	67.079	138.345	0.399283	24909.6	664.483	28.0033	50.0133	Steppe	Eolean
TP334	0-10cm	3266	5.13378	353.089	0.3948	2.2928	540.011	67.079	267	0.662751	22216.9	503.977	23.7533	41.73	Steppe	Clastic sedimentary rock
TP335	0-10cm	3197	14.3387	56.646	0.4358	2.28504	560.882	67.079	268.156	0.669704	23628	572.2	29.2767	48.03	Meadow	Acid metamorphic rock
TP336	0-10cm	2559	3.08052	208.496	0.3371	5.99217	506.351	33.5694	81.2574	0.388044	18331.5	438.827	21.8033	39.7	Steppe	Eolean
TP337	0-10cm	2819	16.9475	33.0558	0.4568	3.59319	567.903	24.484	329.294	0.805237	24639.9	550.287	26.2133	56.9933	Shrub	Clastic sedimentary rock
TP338	0-10cm	1961	20.2319	355.795	0.3262	7.89495	482.355	24.484	90.9652	0.348464	20420.9	471.807	24.7033		Steppe	Fluvial
TP339	0-10cm	2799	1.00942	32.4712	0.0225	5.41839	37.5493	22.6608	22.9956	0.256611	12005.2	336.8	13.155		Desert	Fluvial
TP340	0-10cm	2972	1.47282	3.01279	0.0346	5.00741	63.6855	22.6608	2.45437	0.0591638	19960.1	479.56	20.35		Desert	Fluvial
TP341	0-10cm	2827	0.437983	45	0.0343	5.51601	66.3502	45.7133	2.13824	0.0634207	17586	475.873	21.9167		Desert	Eolean
TP342	0-10cm	2865	0.935468	24.444	0.063	5.60159	121.765	45.7133	0.659197	0.0546057	18470.5	424.383	16.32		Desert	Fluvial
TP343	0-10cm	2847	0.309704	180	0.0935	5.36787	176.131	45.7133	47.0987	0.234145	11649.7	387.817	18.3633		Desert	Fluvial
TP344	0-10cm	3334	13.4789	97.125	0.1599	1.90047	249.683	45.7133	42.4826	0.345965	23541.3	626.39	28.6167		Steppe	Fluvial
TP345	0-10cm	3711	3.57044	355.03	0.2573	-2.6971	318.446	45.7133	28.8815	0.158138	21550	543.413	26.2933	33.23	Steppe	Fluvial
TP346	0-10cm	3297	1.00942	57.5288	0.2074	1.7747	320.373	135.808	47.2618	0.258159	19526.1	532.503	24.9533	36.36	Steppe	Clastic sedimentary rock
TP347	0-10cm	3133	1.9488	6.84277	0.2268	2.89863	354.775	135.808	89.1867	0.383817	21218.3	535.127	27.7133	43.14	Desert	Clastic sedimentary rock
TP348	0-10cm	3102	0.789551	101.31	0.2777	3.4881	429.07	135.808	78.3678	0.344196	20039.1	515.213	21.5733	41.34	Steppe	Clastic sedimentary rock
TP349	0-10cm	2830	7.12821	6.20345	0.28	4.46013	443.433	135.808	57.5252	0.247686	35320.1	757.293	26.21	74.13	Desert	Clastic sedimentary rock
TP350	0-10cm	3427	2.56391	174.806	0.4392	0.339602	553.173	135.808	198.221	0.561112	25675	576.155	30.285		Meadow	Acid metamorphic rock
TP351	0-10cm	3035	15.7575	110.171	0.4797	2.26252	567.551	40.567	224.291	0.726214	31555.1	688.347	31.4033	60.23	Shrub	Clastic sedimentary rock
TP352	0-10cm	3035	8.70455	249.326	0.4822	2.47957	559.564	40.567	313.011	0.769131	29855.4	667.237	27.1033	56.67	Shrub	Eolean
TP353	0-10cm	2348	16.7219	154.703	0.3468	6.04938	457.575	26.6997			24926.6	627.167	27.23	40.45	Steppe	Clastic sedimentary rock
TP354	0-10cm	2885	2.87178	207.255	0.084	5.19811	169.721	45.7133	8.26751	0.0823313	14141.7	382.69	14.7833		Desert	Fluvial
TP355	0-10cm	3127	2.24556	181.975	0.1216	4.09183	225.446	45.7133	17.608	0.122906	12251.7	375.563	14.4833		Desert	Eolean
TP356	0-10cm	3129	2.73537	331.26	0.1521	2.15734	253.439	42.7963	28.0208	0.145132	19308.5	588.28	22.435		Steppe	Acid metamorphic rock
TP357	0-10cm	3391	4.96458	5.35582	0.2031	-0.543727	295.751	42.7963	93.7532	0.329001	22924.9	540.503	27.28		Steppe	Acid metamorphic rock
TP358	0-10cm	4572	4.16222	238.671	0.3117	1.09863	323.664	62.2201	53.1499	0.264677	14131	332.487	13.9967		Steppe	Clastic sedimentary rock
TP359	0-10cm	3097	0.489678	251.565	0.18	2.0651	283.705	42.7963	39.194	0.26408	26715.9	646.395	32.3767	42.9333	Desert	Fluvial
TP360	0-10cm	3828	2.89664	235.886	0.3622	-2.72176	414.229	135.808	264.793	0.666236	26149.8	553.864	34.08	59.49	Meadow	Carbonate rock
TP361	0-10cm	3326	5.49401	245.956	0.3285	0.687938	454.376	135.808	384.822	0.787454	21698.1	496.31	23.2833	48.62	Meadow	Eolean
TP362	0-10cm	3188	2.21606	77.9052	0.4223	-0.01137	532.944	39.8617	400.638	0.856028	23571.4	590.107	26.3067	50.2767	Meadow	Fluvial
TP363	0-10cm	2703	7.27975	96.0725	0.3595	3.8047	513.911	9.84067	320.293	0.71908	23628.8	576.573	40.42	54.33	Steppe
TP364	0-10cm	2404	11.8762	223.438	0.3118	5.60848	440.934	2.1306	164.355	0.564253	23215.5	600.057	31.0067	41.92	Steppe	Eolean
TP365	0-10cm	2204	10.7706	112.557	0.2984	3.49464	500.429	38.4007	240.782	0.669774	22400.2	493.688	25.015		Steppe	Eolean
TP366	0-10cm	4543	0.547473	81.8699	0.2418	1.34546	268.751	25.7147	59.8189	0.275462	17859.2	484.557	18.6933	45.105	Steppe	Acid igneous rock
TP367	0-10cm	4700	2.07667	26.5651	0.2889	0.553505	311.196	14.4765	34.8877	0.189539	14223	325.463	18.21		Shrub	Fluvial
TP368	0-10cm	2879	0.558314	56.3099	0.0226	3.90389	35.5668	22.6608	9.91755	0.154073	15253.7	429.933	18.2133		Meadow	Fluvial
TP369	0-10cm	3207	1.27674	165.964	0.0545	2.00371	90.5255	26.0917	6.91341	0.0746375	13921.7	383.78	13.94		Desert	Fluvial
TP370	0-10cm	3553	2.30082	42.2737	0.1048	-0.876854	155.834	26.0917	18.1996	0.137239	21185.1	551.007	23.2067		Desert	Acid metamorphic rock
TP371	0-10cm	2850	0.979284	108.435	0.0695	4.48235	131.056	19.841	14.3922	0.11764	21276.3	554.522	23.4033		Desert	Fluvial
TP372	0-10cm	3604	0.394794	168.69	0.2203	4.50212	184.411	19.841	9.6043	0.113028	23791.8	609.322	28.37	51.585	Cropland	Eolean
TP373	0-10cm	2881	2.03592	171.254	0.111	4.5349	214.106	19.841	23.0273	0.136689	11663	348.763	10.3867		Desert	Eolean
TP374	0-10cm	3285	2.34205	277.595	0.2106	-1.15001	302.459	42.7963	40.3055	0.33818	26938.8	643.842	29.4175	47.125	Steppe	Fluvial
TP375	0-10cm	3737	5.15108	246.125	0.3088	-3.81815	375.302	83.7977	206.02	0.724884	40683.8	862.56	38.06	73.0867	Meadow	Fluvial
TP376	0-10cm	3504	4.43758	324.926	0.2758	-1.44004	372.729	83.7977	298.197	0.735176	26097.3	586.289	29.4736	58.4109	Meadow	Eolean
TP377	0-10cm	4876	4.81154	137.603	0.2172	-0.259959	253.529	53.3177	71.7433	0.38601	23952	593.45	25.9867	58.8267	Meadow
TP378	0-10cm	3247	1.93648	182.291	0.2658	1.1582	403.946	84.1726	128.652	0.570353	26285	626.097	28.9767	43.325	Steppe	Eolean
TP379	0-10cm	3303	4.63546	143.13	0.3362	0.77397	471.376	84.1726	298.813	0.663837	22915.8	514.807	24.9867		Steppe	Eolean
TP380	0-10cm	3357	0.941852	189.462	0.3894	-0.294053	512.542	39.8617	361.632	0.76096	28440.9	677.03	28.8533	64.15	Steppe	Fluvial
TP381	0-10cm	3059	3.45842	153.435	0.5227	-0.55167	591.821	19.8297	391.091	0.822599	30430.7	625.323	32.9067	45.35	Shrub	Clastic sedimentary rock
TP382	0-10cm	3135	7.94282	201.595	0.4886	0.371894	569.584	42.5384	355.993	0.810023	28838.3	713.307	32.27	71.36	Meadow	Carbonate rock
TP383	0-10cm	2610	21.7057	11.1573	0.3647	2.82126	464.321	42.5384	276.08	0.688953	29520	696.953	37.21	76.63	Forest	Acid igneous rock
TP384	0-10cm	4549	1.86081	135	0.2428	1.41631	313.389	53.3177	111.389	0.515591	36625.9	601.58	34.2067	112.043	Steppe
TP385	0-10cm	4153	13.6033	88.4	0.2983	3.61137	421.775	53.3177	129.139	0.32121	28149.1	580.843	27.0833	62.3867	Shrub	Acid metamorphic rock
TP386	0-10cm	2909	0.941852	99.4623	0.0255	3.50975	31.822	26.0917	0.992943	0.0556402	13502	390.583	14.7233		Desert	Eolean
TP387	0-10cm	3335	1.78192	214.38	0.0634	0.993098	94.7487	26.0917	4.77552	0.0818284	22110.9	553.037	24.5933	45.36	Desert	Fluvial
TP388	0-10cm	4089	7.83764	46.5911	0.3005	4.0932	421.481	53.3177	79.6095	0.254017	12376.5	439.897	18.4933		Steppe	Acid metamorphic rock
TP389	0-10cm	3761	2.86345	1.54816	0.1217	-2.24384	166.833	26.0917	19.8615	0.141913	21711.1	556.08	26.3833		Desert	Acid metamorphic rock
TP390	0-10cm	3688	7.41702	175.236	0.1723	-2.99354	226.332	19.841	70.2395	0.363764	29480.1	730.53	32.96	62.36	Desert	Acid metamorphic rock
TP391	0-10cm	4050	11.7149	115.062	0.2682	-6.1876	297.699	19.841	41.0127	0.31992	27199.5	629.733	30.68	47.17	Meadow	Acid igneous rock
TP392	0-10cm	3690	7.40753	200.695	0.4725	-4.86928	475.878	84.1726	266.209	0.668831	29914.3	678.693	29.6367	70.2367	Meadow	Fluvial
TP393	0-10cm	3705	5.77138	150.35	0.529	-4.7998	503.744	101.885	266.568	0.669718	32823	852.173	32.5267	58.2433	Meadow	Fluvial
TP394	0-10cm		1.489	152.103		-3.61942	524.905	101.885	345.068	0.821521	26123.8	540.237	30.0167	67.9733	Steppe	Acid metamorphic rock
TP395	0-10cm	3930	3.97338	52.9072	0.3296	5.26295	486.868	31.6272	48.077	0.27782	26888.9	626.533	25.3833	49.0533	Steppe	Fluvial
TP396	0-10cm	3488	12.728	12.7891	0.6162	-4.35509	570.326	42.5384	288.633	0.722505	32983.6	853.128	36.365	84.3025	Meadow	Acid metamorphic rock
TP397	0-10cm	3422	13.3222	250.324	0.6147	-3.98863	585.447	42.5384	165.952	0.70053	28949.7	665.88	33.7	73.8733	Steppe	Clastic sedimentary rock
TP398	0-10cm	4008	5.84873	81.6561	0.2787	4.69567	406.97	32.6714	59.5296	0.214775	17870.9	502.38	35.5967	99.96	Steppe	Fluvial
TP399	0-10cm	2938	0.979284	251.565	0.0286	3.48644	33.5712	26.0917	2.01843	0.0520133	20518.4	465.653	24.9933		Desert	Fluvial
TP400	0-10cm	2835	1.0783	201.038	0.0174	3.15269	24.2295	26.0917	2.88273	0.0647573	14331.9	429.82	15.6533		Desert	Eolean
TP401	0-10cm	3832	10.602	341.042	0.2755	5.98166	432.257	32.6714	92.9981	0.43651	29445.3	604.28	26.9833	65.14	Shrub	Fluvial
TP402	0-10cm	2821	0.547473	315	0.0248	3.7293	43.4687	26.0917	13.8362	0.0950366	21674.7	568.523	20.8133		Desert	Fluvial
TP403	0-10cm	3916	4.83616	243.435	0.2492	5.48495	387.409	46.9842	98.1222	0.464501	22861.5	555.407	22.9233	38.055	Steppe	Fluvial
TP404	0-10cm	3033	11.2139	207.613	0.4029	-3.18703	453.248	101.885	196.402	0.656595	29729.7	670.215	30.105	54.93	Meadow	Acid metamorphic rock
TP405	0-10cm	3036	10.0843	143.653	0.4057	-1.88116	469.26	101.885	346.055	0.773203	31783.5	797.025	37.0633	69.8267	Meadow	Carbonate rock
TP406	0-10cm	3669	6.77128	168.179	0.25	7.62253	407.245	10.9726	151.778	0.348197	31813.2	643.727	29.72	66.5	Cropland	Clastic sedimentary rock
TP407	0-10cm	3373	3.08052	208.496	0.2636	-3.37878	333.779	101.885	75.2757	0.356503	21246	511.783	15.18	37.31	Steppe	Fluvial
TP408	0-10cm	3860	11.7168	151.598	0.4245	-6.63777	408.479	101.885	60.6987	0.578135	24880	607.553	28.77	39.435	Meadow	Carbonate rock
TP409	0-10cm	2963	4.49219	220.815	0.3825	-3.66731	423.876	6.77183	150.494	0.533416	28980.6	690.042	32.9283	61.68	Meadow	Clastic sedimentary rock
TP410	0-10cm	3577	4.90685	61.8214	0.2532	7.77991	397.849	15.2006	33.789	0.324519	27362.7	684.715	30.35	58.22	Shrub	Clastic sedimentary rock
TP411	0-10cm	3620	14.4008	0.60309	0.2255	7.53942	350.821	16.7808	140.027	0.446715	28312.8	751.373	29.6133	63.7533	Shrub	Clastic sedimentary rock
TP412	0-10cm	3951	11.5338	191.459	0.3572	-7.13277	314.907	6.77183	12.7489	0.301231	29415.5	679.983	28.9833		Steppe	Carbonate rock
TP413	0-10cm	3262	8.894	16.5571	0.2678	-4.19588	297.133	6.77183	67.2286	0.373225	27157.3	620.923	29.05	55.27	Steppe	Clastic sedimentary rock
TP414	0-10cm				0.1609	1.42812	252.777	6.77183			27430.3	666.603	28.84	51.6167	Desert	Clastic sedimentary rock
TP415	0-10cm	3109	3.23001	16.6992	0.1014	-0.674806	131.555	6.77183			25587.1	617.887	29.5267		Steppe	Clastic sedimentary rock
TP416	0-10cm	2692	1.65654	307.405	0.0831	1.51171	121.186	6.77183			26882.3	620.713	28.46	61.11	Steppe	Fluvial
TP417	0-10cm	2108	0.66602	305.538	0.0591	5.19707	100.689	11.1059			19266.3	453.703	18.9633		Desert	Fluvial
TP418	0-10cm				0.1241	-0.320166	159.074	11.1059	12.1266	0.20235	27405.8	675.02	29.2133		Steppe	Eolean
TP419	0-10cm	3104	13.0036	34.992	0.5892	3.00658	676.255	7.13025	324.823	0.735268	26193.5	563.923	29.9167	51.8733	Shrub	Carbonate rock
TP420	0-10cm	2931	7.11089	320.274	0.5491	3.1127	645.298	24.3345	394.713	0.778203	27355.8	567.55	27.1167	53.3867	Meadow	Acid metamorphic rock
TP421	0-10cm	2319	10.938	312.166	0.4957	4.90536	591.548	24.3345		0.361951	23636.9	588.65	34.78	52.53	Forest	Carbonate rock
TP422	0-10cm				0.4935	4.53163	588.719				31502.3	685.413	36.95	71.8667	Forest	Eolean
TP423	0-10cm				0.5228	4.58083	614.01	6.00205			30777.4	636.21	38.7367	72.3233	Forest	Eolean
TP424	0-10cm	2686	31.9331	49.7491	0.4485	1.15062	507.215	42.5384	332.433	0.744172	26231.4	656.577	27.1767	65.2833	Shrub	Eolean
TP425	0-10cm	2363	16.2049	70.7225	0.3386	2.69937	425.764	47.1127		0.487381	25770.5	599.657	31.39	62.845	Shrub	Eolean
TP426	0-10cm	2123	35.7156	8.64791	0.3195	4.21236	400.34				29211.5	671.723	37.6033	66.8733	Forest	Eolean
TP427	0-10cm	3038	13.1973	205.974	0.5256	6.36311	607.605	8.28594	514.018	0.873777	22346.9	449.057	28.9233	48.87	Steppe	Fluvial
TP428	0-10cm	3170	5.43876	304.592	0.4577	7.79288	569.875	8.28594	565.816	0.703888	9747.53	569.067	21.1633		Forest	Fluvial
TP429	0-10cm	3227	4.13783	57.2005	0.4961	6.72245	581.248	8.28594	635.777	0.843257	9194	410.705	19.275		Forest	Fluvial
TP430	0-10cm	4063	17.7265	198.741	0.7333	0.0412135	611.742	8.28594	174.183	0.80449	14473	337.665	17.3433	53.4067	Meadow	Clastic sedimentary rock
TP431	0-10cm	3667	20.7376	51.0847	0.5313	2.65326	555.539	13.186	456.7	0.772356	20347.2	386.823	20.3533	41.92	Forest	Clastic sedimentary rock
TP432	0-10cm	2547	5.24236	313.807	0.6858	9.78672	796.958	8.28594	518.103	0.856457	30982	836.981	32.7443	76.05	Forest	Fluvial
TP433	0-10cm	3409	26.6723	353.047	0.5977	4.56587	628.212	8.28594	390.67	0.90733	24158.8	752.88	30.5	55.8033	Forest	Fluvial
TP434	0-10cm	4051	15.0502	309.289	0.6948	0.0280475	618.117	8.28594	260.045	0.821895	26142.5	475.448	30.6933	60.3633	Forest	Acid igneous rock
TP435	0-10cm	3170	24.0059	45.9835	0.5166	8.1895	627.733	8.28594	334.431	0.84522	26786.7	394.167	21.93	57.4533	Forest	Carbonate rock
TP436	0-10cm	3267	29.6104	104.036	0.6174	6.3653	683.73	9.2274	385.447	0.873851	24564.6	999.98	32.77	57.375	Forest	Fluvial
TP437	0-10cm	3087	16.5422	15.3008	0.5871	7.72176	668.621	9.2274	447.863	0.829696	35245.1	649.473	26.67	59.2533	Forest	Fluvial
TP438	0-10cm	2954	9.59054	271.375	0.5742	8.40984	671.278	9.2274	506.097	0.750357	28174.3	472.987	24.75	65.6167	Cropland	Carbonate rock
TP439	0-10cm	3089	3.635	29.2914	0.4924	9.51501	631.984	9.2274	556.908	0.761755	36733.1	772.94	32.3233	82.5033	Forest	Fluvial
TP440	0-10cm	3144	13.3071	212.873	0.5192	6.39428	582.482	9.2274	531.372	0.858652	28793.6	1094.91	30.53	65.2233	Meadow	Fluvial
TP441	0-10cm	3322	7.09352	214.38	0.6595	3.94704	628.947	9.2274	222.544	0.874241	28957.8	358.22	18.2867	100.34	Meadow	Acid igneous rock
TP442	0-10cm	3186	22.3327	21.4164	0.4113	8.37791	531.366	9.2274	240.363	0.855072	31165.2	738.84	29.71		Forest	Eolean
TP443	0-10cm	3013	8.44607	13.1509	0.3996	9.10973	528.238	9.2274	313.775	0.758107	18121.7	526.36	23.6175		Forest
TP444	0-10cm	3354	5.14648	152.281	0.3405	6.35823	413.574	9.38162	485.559	0.842917	54877.5	1106.34	35.6967	103.087	Meadow	Acid igneous rock
TP445	0-10cm	3668	18.4451	85.352	0.6852	3.88013	652.736	8.28594	318.888	0.840325	23285.5	407.08	24.0233	64.75	Forest	Clastic sedimentary rock
TP446	0-10cm	3707	5.48538	87.5805	0.7144	0.848501	633.116	8.28594	323.734	0.855449	19026.6	296.603	17.77	50.28	Meadow	Acid igneous rock
TP447	0-10cm	2851	24.2595	104.411	0.6698	6.44229	705.805	8.28594	492.083	0.861069	23535	515.21	23.3867	41.13	Forest	Fluvial
TP448	0-10cm	2670	17.2544	30.0232	0.6714	7.55397	730.097	8.28594	471.741	0.886639	31649.2	728.745	25.35	50.74	Forest	Fluvial
TP449	0-10cm	3427	21.817	22.843	0.6283	5.05996	657.44	8.28594	422.642	0.854959	31024.4	392.903	21.3367	51.1033	Forest	Clastic sedimentary rock
TP450	0-10cm	2763	11.162	346.535	0.7695	8.29271	831.882	8.61093	536.401	0.836137	24591.6	718.95	30.2333	66.88	Forest	Fluvial
TP451	0-10cm	2661	10.5108	183.759	0.7508	9.21913	848.704	8.61093	397.731	0.772163	30498.6	672.717	30.24	52.7233	Meadow	Fluvial
TP452	0-10cm	2451	14.0789	195.309	0.7759	9.10018	811.937	8.61093	506.771	0.899689	24811.4	544.793	28.9433	62.77	Forest	Acid igneous rock
TP453	0-10cm	2709	7.13726	330.945	0.7026	10.131	843.628	8.61093	464.128	0.39468	40118.3	848.297	29.5967	82.3867	Forest	Fluvial
TP454	0-10cm	2699	8.23649	2.67543	0.734	9.03321	821.221	8.61093	561.763	0.801715	26014.9	431.797	28.46	57.5867	Forest	Fluvial
TP455	0-10cm	2859	8.13673	216.545	0.7871	7.18202	814.652	8.61093	469.035	0.891898	18972.6	477.737	19.4533	47.92	Forest	Fluvial
TP456	0-10cm	2259	6.83097	191.056	0.6419	11.2707	808.889	8.61093	632.425	0.779288	24892.6	591.207	34.1467	45.42	Forest	Acid igneous rock
TP457	0-10cm	2346	4.81771	347.969	0.6985	10.5196	831.785	8.61093	644.378	0.836621	21783.5	408.503	28.33		Forest	Acid igneous rock
TP458	0-10cm	2099	24.3588	15.4051	0.7393	10.2512	824.493	8.61093	653.818	0.935059	19481.3	494.473	19.0067		Forest	Acid igneous rock
TP459	0-10cm	3674	7.08109	104.49	0.9115	0.249164	693.733	8.61093	68.7022	0.690474	19671.3	466.655	19.24	50.09	Meadow	Fluvial
TP460	0-10cm	3396	12.2097	152.475	0.9106	1.79026	730.011	1.05262	211.867	0.816661	33220.8	784.473	35.6433	59.23	Forest	Fluvial
TP461	0-10cm	3459	11.2377	268.831	0.7306	2.95502	684.303	8.61093	426.648	0.884402	19032.1	713.92	30.8133	51.56	Forest	Acid metamorphic rock
TP462	0-10cm	3159	7.21823	129.806	0.7484	6.05397	767.702	8.61093	208.316	0.806863	16266.7	831.183	32.4767		Forest	Acid metamorphic rock
TP463	0-10cm	3522	54.8101	203.414	0.8002	1.74553	689.836	8.61093	141.955	0.763573	13666.9	1074.9	21.8267		Forest	Acid metamorphic rock
TP464	0-10cm	3257	24.305	36.9728	0.7792	5.01941	766.315	8.61093	279.809	0.764189	16034.3	352.97	69.1867	52.28	Forest	Fluvial
TP465	0-10cm	4150	5.5583	244.502	0.6798	1.78148	656.088	25.8167	170.591	0.632215	21009.6	795.41	38.8133	43.8	Meadow	Acid igneous rock
TP466	0-10cm	4263	12.6342	5.88244	1.0132	-2.88477	656.591	10.0426	114.352	0.652833	27112.5	654.17	35.45	53.59	Meadow	Acid igneous rock
TP467	0-10cm	3271	10.5331	212.535	0.8356	5.7349	813.003	10.0426	279.067	0.774718	26952.9	1032.32	36.8675	52.43	Forest	Fluvial
TP468	0-10cm	1848	14.6674	154.626	1.3554	13.778	1561.39	10.0426	620.352	0.734147	29711.5	826.143	26.06		Forest	Acid igneous rock
TP469	0-10cm	1585	16.6682	74.0191	1.6432	15.8116	1930.16	10.0426	566.783	0.810711	11747.4	427.493	17.5467		Forest	Acid igneous rock
TP470	0-10cm	1453	26.5409	127.304	1.6937	16.5345	2084.81	10.0426	447.557	0.861646	17606.9	690.903	28.43		Forest	Clastic sedimentary rock
TP471	0-10cm	1662	15.1873	77.3474	1.4791	14.7879	1687.76	10.0426	537.012	0.874238	18420.6	597.287	31.19		Cropland	Acid igneous rock
TP472	0-10cm	2268	11.1966	235.008	1.1696	9.37008	1186.45	10.0426	458.349	0.908112	21673.7	585.98	27.3133	48.73	Forest	Acid metamorphic rock
TP473	0-10cm	2052	0.882731	37.875	1.2202	12.3485	1344.05	10.0426	417.377	0.86207	17156.6	667.583	30.1633	36.685	Forest	Acid igneous rock
TP474	0-10cm	2152	11.6162	177.74	1.1845	11.3693	1313.48	10.0426	619.905	0.822689	18248.2	1139.06	32.9533	43.29	Forest	Acid igneous rock
TP475	0-10cm	2302	6.35854	292.834	1.1298	10.9397	1205.02	10.0426	522.434	0.775718	25589.4	875.333	30.0633	59.72	Forest	Acid metamorphic rock
TP476	0-10cm	2872	3.29043	29.5778	0.9487	6.36726	892.2	10.0426	451.537	0.821827	27092	853.78	41.72		Forest	Fluvial
TP477	0-10cm	3057	16.581	188.351	0.8368	5.55798	802.428	1.05262	307.463	0.885872	6131.5	166.265	11.79		Meadow	Acid igneous rock
TP478	0-10cm	2757	18.9801	148.496	0.8508	6.32213	836.309	1.05262	169.742	0.860202	3339.62	82.58	7.53		Meadow	Acid igneous rock
TP479	0-10cm	2225	21.7657	113.962	0.895	9.87505	972.132	1.05262	294.103	0.903239	23235.7	409.733	26.4233	54.73	Forest	Acid igneous rock
TP480	0-10cm	759	29.1027	334.244	1.3165	18.4567	1608.02	1.05262	518.217	0.943556	28702.5	727.587	27.95	54.53	Cropland	Clastic sedimentary rock
TP481	0-10cm	1275	25.628	224.315	1.2145	17.4073	1568.35	1.05262	444.58	0.91532	21403	375.707	20.7367	47.655	Cropland	Clastic sedimentary rock
TP482	0-10cm	3473	8.36499	72.8973	0.9112	3.80882	831.956	4.92942	329.98	0.899092	12996.1	257.71	18.3833	54.29	Shrub	Acid metamorphic rock
TP483	0-10cm	2169	22.2637	71.3258	0.7956	11.795	918.912	4.92942	383.473	0.911712	36648.4	646.26	37.48	74.4367	Shrub	Eolean
TP484	0-10cm	3137	25.6945	103.646	1.0844	3.79535	900.394	4.92942	271.715	0.811678	25037.1	294.247	27.4667	82.5333	Shrub
TP485	0-10cm	3116	15.7685	354.508	0.6848	6.24327	770.234	26.0056	569.728	0.890126	30886.2	764.793	34.53	76.9233	Forest	Eolean
TP486	0-10cm	3610	21.4633	342.188	0.6922	5.66112	751.202	26.0056	464.694	0.81134	37807	934.987	40.1033	99.3433	Forest	Acid metamorphic rock
TP487	0-10cm	3771	15.2939	42.9975	0.7043	2.88842	672.06	16.3831	420.277	0.861797	29444.5	651.75	41.4	64.42	Shrub	Acid metamorphic rock
TP488	0-10cm	3424	2.01821	94.3987	0.6129	5.32014	686.381	16.3831	478.847	0.860576	37558.4	711.95	39.9133	85.4233	Forest	Acid metamorphic rock
TP489	0-10cm	4022	18.2249	54.353	0.9488	-0.118606	786.319	26.0056	179.993	0.802039	19743	643.617	29.3533	54.09	Shrub	Acid metamorphic rock
TP490	0-10cm	3170	24.7504	85.2921	0.7948	6.73367	868.629	15.2065	484.38	0.85242	33510.4	749.813	40.91	78.6867	Shrub	Eolean
TP491	0-10cm	2337	20.0715	68.7495	0.7357	11.7524	898.484	15.2065	421.521	0.854	41719.4	638.515	45.1417	99.09	Forest	Clastic sedimentary rock
TP492	0-10cm	2225	27.3053	289.099	0.6362	13.1544	818.081	80.8291	439.276	0.833191	27645.6	795.097	30.2667	82.95	Forest	Eolean
TP493	0-10cm	3475	11.8595	211.849	0.773	7.08822	821.332	80.8291	437.088	0.832698	40242.4	1015.91	41.28	110.047	Forest	Carbonate rock
TP494	0-10cm	2431	7.60423	211.759	0.6786	11.0395	823.006	80.8291	406.353	0.823822	32459.6	1278.22	38.37	95.3267	Forest	Eolean
TP495	0-10cm	2219	23.745	121.688	0.6371	13.8035	829.891	80.8291	313.955	0.774837	34534.6	780.603	35.7067	115.04	Forest	Eolean
TP496	0-10cm	3952	0.66602	125.538	0.6507	2.30727	622.741	16.6065	229.686	0.747357	12331.3	244.45	14.7233	34.44	Forest	Clastic sedimentary rock
TP497	0-10cm	4162	4.55397	104.744	0.7104	0.185428	630.162	32.3091	178.885	0.64706	20780.1	484.403	22.6233	56.2667	Forest	Clastic sedimentary rock
TP498	0-10cm	3784	19.6563	332.756	0.6056	3.74339	621.993	32.3091	441.176	0.785501	26030	851.043	30.8467	75.725	Shrub	Acid metamorphic rock
TP499	0-10cm	4162	4.55397	104.744	0.7104	0.185428	630.162	32.3091	178.885	0.64706	23855.2	653.99	28.2933	74.3	Forest	Clastic sedimentary rock
TP500	0-10cm	4223	18.0961	306.254	0.7156	1.95184	662.921	17.7465	308.117	0.73854	19768.8	427.131	23.9571	65.23	Meadow	Acid metamorphic rock
TP501	0-10cm	4047	18.0637	113.697	0.7204	1.14335	698.875	11.3592	429.083	0.771114	28842.1	700.99	35.73	80.84	Meadow	Acid metamorphic rock
TP502	0-10cm	3227	29.1072	0	0.6074	4.70002	689.345	19.8751	417.603	0.782341	35875.1	807.465	46.48	70.765	Forest	Acid metamorphic rock
TP503	0-10cm	2877	39.1522	349.287	0.5438	7.84133	664.616	18.828	592.073	0.847904	18356	627.38	19.08		Shrub	Eolean
TP504	0-10cm	2563	24.7618	154.861	0.5371	9.80248	681.961	16.3702	560.329	0.814258	25680.4	592.35	34.0967	55.1667	Forest	Eolean
TP505	0-10cm	2658	35.6871	79.1552	0.5248	8.82559	686.862	20.0081	523.406	0.918743	25455.1	538.4	33.2475	45.09	Shrub
TP506	0-10cm	2319	24.7313	7.41691	0.5174	10.9984	670.141	16.3702	500.03	0.832096	28783.1	521.083	31.06	73.27	Shrub
TP507	0-10cm	2591	33.3403	61.5398	0.5473	9.48678	659.798	16.3702	556.184	0.905325	30764.8	698.833	33.9667	65.9	Forest	Eolean
TP508	0-10cm	2837	8.43779	293.062	0.6691	6.08352	726.611	20.0081	503.898	0.892685	29341.7	826.037	41.81	67.3167	Forest	Eolean
TP509	0-10cm	3239	17.1842	97.2803	0.7739	3.69623	744.832	20.0081	502.002	0.901828	30451.4	788.95	41.8	62.84	Shrub	Eolean
TP510	0-10cm	3984	17.0039	51.4588	0.9706	-0.454477	780.163	20.0081	419.193	0.861028	21064.3	245.13	20.44	86.925	Shrub	Acid metamorphic rock
TP511	0-10cm	3689	14.2407	277.958	0.8672	0.7654	766.41	16.7461	466.287	0.864279	26342.8	350.357	32.0067	72.84	Shrub	Acid metamorphic rock
TP512	0-10cm	3514	3.6202	70.0169	0.8279	2.09693	783.936	25.5493	447.266	0.869254	32126.8	733.273	33.57	79.5633	Shrub	Acid metamorphic rock
TP513	0-10cm	3284	28.3432	47.4366	0.8179	3.26223	776.429	25.5493	449.429	0.847675	24440.1	723.11	37.0233	67.1433	Forest	Eolean
TP514	0-10cm	2500	14.7141	171.119	0.8833	5.09343	768.263	13.0392	540.771	0.933339	30822.3	1198.22	40.2867	63.685	Forest	Clastic sedimentary rock
TP515	0-10cm	2638	24.662	132.376	0.7901	6.09191	751.25	13.0392	519.466	0.909016	34588.8	848.4	44.4567	86	Shrub
TP516	0-10cm	3177	10.5369	220.285	0.8729	3.012	771.857	13.0392	411.366	0.884859	26091.9	636.503	38.0633	59.8933	Forest	Eolean
TP517	0-10cm	2161	13.502	281.689	0.9373	10.7517	862.093	11.6285	449.825	0.919573	44914.7	746.47	45.49	87.31	Forest
TP518	0-10cm	2570	18.7432	252.142	0.7573	6.93511	767.155	25.3105	318.573	0.747526	28347.1	540.487	33.68	63.47	Shrub
TP519	0-10cm	3532	4.78803	72.1497	0.8772	1.28946	770.218	25.3105	434.955	0.888838	22569.8	472.83	26.61	63.485	Forest	Clastic sedimentary rock
TP520	0-10cm	2714	1.38478	153.435	0.7539	3.77568	733.747	16.21	356.848	0.847926	20307.6	529.457	44.9367	68.52	Forest	Acid metamorphic rock
TP521	0-10cm	2216	9.98227	266.479	0.6219	6.2252	667.255	16.21	530.159	0.882676	25214.1	515.037	30.88		Forest	Eolean
TP522	0-10cm	1859	22.9864	257.115	0.5971	8.22708	671.393	16.21	514.825	0.857642	26067.8	819.81	33.6233		Forest
TP523	0-10cm	3761	6.78864	309.472	0.8791	0.30594	777.674	25.3105	331.589	0.769863	25478.1	569.775	26.55	60.425	Meadow
TP524	0-10cm	3307	16.5432	307.235	0.6616	2.50991	736.15		412.486	0.842181	28191	741.95	31.1867	43.71	Meadow	Clastic sedimentary rock
TP525	0-10cm	3083	15.0142	349.256	0.6437	3.20566	723.783	31.4858	442.788	0.788377	25251.3	533.733	30.2333	61.18	Meadow	Acid metamorphic rock
TP526	0-10cm	3301	18.6908	257.074	0.668	5.924	676.955	15.5129	477.19	0.805236	27208.6	487.023	29.5167		Cropland	Acid metamorphic rock
