# Supplementary material
Source: Copernicus journal article supplement (doi:10.5194/essd-18-1561-2026)
Supplement: Supplementary file [file essd-18-1561-2026-supplement-title-page.pdf › essd-18-1561-2026-supplement-title-page.pdf]

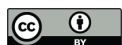

## *Supplement of*

# **Mapping key soil micronutrients across the Tibetan Plateau**

**Huangyu Huo et al.**

*Correspondence to:* Yafeng Wang (yfwang@itpcas.ac.cn) and Jinzhi Ding (jzding@itpcas.ac.cn)

- [essd-18-1561-2026-supplement-title-page.pdf](#)
- [Metadata.xlsx](#)
- [Supplementary material.pdf](#)

The copyright of individual parts of the supplement might differ from the article licence.
